# Supplementary material
Source: publisher site journal article supplement (https://www.dovepress.com/article/610117)
Supplement: Supplementary file 1 [file Supplymentary%20Data_2.docx]

CONTENT

[Table A.1 Decomposition analysis of ASMR in LRIs attributed to ambient particulate matter pollution among WCBA in global and 5 SDI regions from 1990 to 2021 3](#_Toc229780858)

[Table A.2 Decomposition analysis of ASMR in LRIs attributed to household air pollution from solid fuels among WCBA in global and 5 SDI regions from 1990 to 2021 4](#_Toc229780859)

[Table A.3 Decomposition analysis of ASDR in LRIs attributed to ambient particulate matter pollution among WCBA in global and 5 SDI regions from 1990 to 2021 5](#_Toc229780860)

[Table A.4 Decomposition analysis of ASDR in LRIs attributed to household air pollution from solid fuels among WCBA in global and 5 SDI regions from 1990 to 2021 6](#_Toc229780861)

[Table B.1 Age effect on deaths of LRIs attributed to ambient particulate matter pollution among WCBA globally from 1990 to 2021 7](#_Toc229780862)

[Table B.2 Age effect on deaths of LRIs attributed to household air pollution from solid fuels among WCBA globally from 1990 to 2021 8](#_Toc229780863)

[Table B.3 Period effect on deaths of LRIs attributed to ambient particulate matter pollution among WCBA globally from 1990 to 2021 9](#_Toc229780864)

[Table B.4 Period effect on deaths of LRIs attributed to household air pollution from solid fuels among WCBA globally from 1990 to 2021 10](#_Toc229780865)

[Table B.5 Cohort effect on deaths of LRIs attributed to ambient particulate matter pollution among WCBA globally from 1990 to 2021 11](#_Toc229780866)

[Table B.6 Cohort effect on deaths of LRIs attributed to household air pollution from solid fuels among WCBA globally from 1990 to 2021 12](#_Toc229780867)

[Table B.7 Age effect on DALYs of LRIs attributed to ambient particulate matter pollution among WCBA globally from 1990 to 2021 13](#_Toc229780868)

[Table B.8 Age effect on DALYs of LRIs attributed to household air pollution from solid fuels among WCBA globally from 1990 to 2021 14](#_Toc229780869)

[Table B.9 Period effect on DALYs of LRIs attributed to ambient particulate matter pollution among WCBA globally from 1990 to 2021 15](#_Toc229780870)

[Table B.10 Period effect on DALYs of LRIs attributed to household air pollution from solid fuels among WCBA globally from 1990 to 2021 16](#_Toc229780871)

[Table B.11 Cohort effect on DALYs of LRIs attributed to ambient particulate matter pollution among WCBA globally from 1990 to 2021 17](#_Toc229780872)

[Table B.12 Cohort effect on DALYs of LRIs attributed to household air pollution from solid fuels among WCBA globally from 1990 to 2021 18](#_Toc229780873)

[Table C.1 Concentration Index of health inequality in LRIs among WCBA 19](#_Toc229780874)

[Table C.2 SII of health inequality of deaths in LRIs attributed to ambient particulate matter pollution among WCBA 20](#_Toc229780875)

[Table C.3 SII of health inequality of deaths in LRIs attributed to household air pollution from solid fuels among WCBA 22](#_Toc229780876)

[Table C.4 SII of health inequality of DALYs in LRIs attributed to ambient particulate matter pollution among WCBA 24](#_Toc229780877)

[Table C.5 SII of health inequality of DALYs in LRIs attributed to household air pollution from solid fuels among WCBA 26](#_Toc229780878)

[Table D.1 Frontier analysis of deaths in LRIs attributed to ambient particulate matter pollution among WCBA in 204 countries and territories, 2021 28](#_Toc229780879)

[Table D.2 Frontier analysis of deaths in LRIs attributed to household air pollution from solid fuels among WCBA in 204 countries and territories, 2021 36](#_Toc229780880)

[Table D.3 Frontier analysis of DALYs in LRIs attributed to ambient particulate matter pollution among WCBA in 204 countries and territories, 2021 44](#_Toc229780881)

[Table D.4 Frontier analysis of DALYs in LRIs attributed to household air pollution from solid fuels among WCBA in 204 countries and territories, 2021 52](#_Toc229780882)

[Fig. S1 APC Analysis of air pollution associated LRIs Burden Dynamics in WCBA 60](#_Toc229780883)

[Fig. S2 SHAP-Aided XGBoost Model Interpretation for LRIs Mortality Among WCBA Across 5 SDI 61](#_Toc229780884)

[Fig. S3 XGBoost Model Interpretation via SHAP for LRIs DALYs Among WCBA Across 5 SDI 62](#_Toc229780885)

[Fig. S4 XGBoost Model Interpretation via SHAP for LRIs Mortality Among WCBA Across Each SDI 63](#_Toc229780886)

[Fig. S5 XGBoost Model Interpretation via SHAP for LRIs DALYs Among WCBA Across Each SDI 64](#_Toc229780887)

[Fig. S6 XGBoost Model Interpretation via SHAP for LRIs DALYs Among WCBA Across Five SDI 65](#_Toc229780888)

[Fig. S7 Frontier Analysis of LRI Epidemiology and SDI Across 204 Countries and Territories, 1990-2021 66](#_Toc229780889)

| Table A.1 Decomposition analysis of ASMR in LRIs attributed to ambient particulate matter pollution among WCBA in global and 5 SDI regions from 1990 to 2021 | | | | |
| --- | --- | --- | --- | --- |
| location | Overall difference | Aging | Population | Epidemiological change |
| Global | 3739.20 | 247.42 | 5107.12 | -1615.34 |
| High SDI | -878.81 | -17.87 | 450.49 | -1311.43 |
| Low SDI | 984.13 | 71.74 | 2262.56 | -1350.17 |
| Middle SDI | 644.17 | -24.32 | 853.29 | -184.80 |
| Low-middle SDI | 1038.48 | 80.63 | 1038.02 | -80.17 |
| High-middle SDI | 210.57 | 66.95 | 638.59 | -494.96 |
| ASMR, Age-Standardized Mortality Rate; LRIs, Lower Respiratory Infections; WCBA, women of Childbearing Age; SDI, Socio-Demographic Index | | | | |

| Table A.2 Decomposition analysis of ASMR in LRIs attributed to household air pollution from solid fuels among WCBA in global and 5 SDI regions from 1990 to 2021 | | | | |
| --- | --- | --- | --- | --- |
| location | Overall difference | Aging | Population | Epidemiological change |
| Global | -9138.28 | 530.52 | 13395.53 | -23064.33 |
| High SDI | -237.28 | -0.56 | 27.22 | -263.94 |
| Low SDI | 3125.28 | 722.18 | 17932.85 | -15529.75 |
| High-middle SDI | -1838.64 | 33.00 | 441.57 | -2313.20 |
| Middle SDI | -2934.63 | -32.79 | 1168.34 | -4070.18 |
| Low-middle SDI | -2928.81 | 308.39 | 3750.21 | -6987.41 |
| ASMR, Age-Standardized Mortality Rate; LRIs, Lower Respiratory Infections; WCBA, women of Childbearing Age; SDI, Socio-Demographic Index | | | | |

| Table A.3 Decomposition analysis of ASDR in LRIs attributed to ambient particulate matter pollution among WCBA in global and 5 SDI regions from 1990 to 2021 | | | | |
| --- | --- | --- | --- | --- |
| location | Overall difference | Aging | Population | Epidemiological change |
| Global | 203926.15 | 6006.83 | 292463.05 | -94543.73 |
| High SDI | -50012.52 | -585.80 | 24536.81 | -73963.52 |
| Low SDI | 55069.25 | 1452.25 | 131183.43 | -77566.42 |
| Middle SDI | 34558.02 | -679.24 | 46192.33 | -10955.07 |
| Low-middle SDI | 56597.96 | 2026.16 | 59990.42 | -5418.61 |
| High-middle SDI | 10039.28 | 1792.34 | 36324.51 | -28077.56 |
| ASDR, Age-Standardized DALYs Rate; DALYs, Disability - Adjusted Life Years; LRIs, Lower Respiratory Infections; WCBA, women of Childbearing Age; SDI, Socio-Demographic Index | | | | |

| Table A.4 Decomposition analysis of ASDR in LRIs attributed to household air pollution from solid fuels among WCBA in global and 5 SDI regions from 1990 to 2021 | | | | |
| --- | --- | --- | --- | --- |
| location | Overall difference | Aging | Population | Epidemiological change |
| Global | -568445.56 | 210.26 | 782736.43 | -1351392.24 |
| High SDI | -13518.89 | -11.75 | 1549.13 | -15056.27 |
| Low SDI | 107356.84 | 13112.58 | 1086790.94 | -992546.68 |
| High-middle SDI | -108567.25 | 17.78 | 25775.59 | -134360.62 |
| Middle SDI | -154579.66 | -50.95 | 62297.78 | -216826.50 |
| Low-middle SDI | -196234.49 | 4434.44 | 225007.64 | -425676.56 |
| ASDR, Age-Standardized DALYs Rate; DALYs, Disability - Adjusted Life Years; LRIs, Lower Respiratory Infections; WCBA, women of Childbearing Age; SDI, Socio-Demographic Index | | | | |

| Table B.1 Age effect on deaths of LRIs attributed to ambient particulate matter pollution among WCBA globally from 1990 to 2021 | |
| --- | --- |
| Age, Years | Rate Ratio (95% CI) |
| 17.5 | 0.84 (0.11, 6.72) |
| 22.5 | 0.88 (0.13, 6.05) |
| 27.5 | 0.93 (0.15, 5.78) |
| 32.5 | 1.00 |
| 37.5 | 1.27 (0.23, 6.91) |
| 42.5 | 1.66 (0.31, 8.80) |
| 47.5 | 2.24 (0.41, 12.09) |
| LRIs, Lower Respiratory Infections; WCBA, women of Childbearing Age | |

| Table B.2 Age effect on deaths of LRIs attributed to household air pollution from solid fuels among WCBA globally from 1990 to 2021 | |
| --- | --- |
| Age, Years | Rate Ratio (95% CI) |
| 17.5 | 1.3 (0.37, 4.57) |
| 22.5 | 1.16 (0.35 3.83) |
| 27.5 | 1.18 (0.39, 3.62) |
| 32.5 | 1.00 |
| 37.5 | 1.07 (0.36, 3.18) |
| 42.5 | 1.27 (0.42, 3.62) |
| 47.5 | 1.4 (0.46, 4.31) |
| LRIs, Lower Respiratory Infections; WCBA, women of Childbearing Age | |

| Table B.3 Period effect on deaths of LRIs attributed to ambient particulate matter pollution among WCBA globally from 1990 to 2021 | |
| --- | --- |
| Period | Rate Ratio (95% CI) |
| 1992.5 | 1.16 (0.20, 6.84) |
| 1997.5 | 1.13 (0.21, 5.99) |
| 2002.5 | 1.05 (0.21, 5.26) |
| 2007.5 | 1.00 |
| 2012.5 | 0.88 (0.17, 4.44) |
| 2017.5 | 0.86 (0.17, 4.33) |
| 2022.5 | 0.74 (0.14, 3.91) |
| LRIs, Lower Respiratory Infections; WCBA, women of Childbearing Age | |

| Table B.4 Period effect on deaths of LRIs attributed to household air pollution from solid fuels among WCBA globally from 1990 to 2021 | |
| --- | --- |
| Period | Rate Ratio (95% CI) |
| 1992.5 | 1.43 (0.50, 4.13) |
| 1997.5 | 1.37 (0.50, 3.72) |
| 2002.5 | 1.19 (0.44, 3.20) |
| 2007.5 | 1.00 |
| 2012.5 | 0.79 (0.27, 2.26) |
| 2017.5 | 0.61 (0.20, 1.86) |
| 2022.5 | 0.51 (0.16, 1.62) |
| LRIs, Lower Respiratory Infections; WCBA, women of Childbearing Age | |

| Table B.5 Cohort effect on deaths of LRIs attributed to ambient particulate matter pollution among WCBA globally from 1990 to 2021 | |
| --- | --- |
| Cohort | Rate Ratio (95% CI) |
| 1945 | 2.06 (0.12, 35.59) |
| 1950 | 1.72 (0.19, 15.24) |
| 1955 | 1.43 (0.21, 10.00) |
| 1960 | 1.3 (0.21, 8.04) |
| 1965 | 1.15 (0.20, 6.52) |
| 1970 | 1.01 (0.19, 5.29) |
| 1975 | 1.00 |
| 1980 | 1.01 (0.18, 5.55) |
| 1985 | 0.92 (0.14, 6.17) |
| 1990 | 0.80 (0.09, 6.99) |
| 1995 | 0.79 (0.06, 9.64) |
| 2000 | 0.82 (0.04, 16.68) |
| 2005 | 0.78 (0.01, 58.50) |
| LRIs, Lower Respiratory Infections; WCBA, women of Childbearing Age | |

| Table B.6 Cohort effect on deaths of LRIs attributed to household air pollution from solid fuels among WCBA globally from 1990 to 2021 | |
| --- | --- |
| Cohort | Rate Ratio (95% CI) |
| 1945 | 5.01 (0.88, 28.46) |
| 1950 | 3.40 (0.86, 13.46) |
| 1955 | 2.41 (0.70, 8.24) |
| 1960 | 1.88 (0.59, 6.01) |
| 1965 | 1.44 (0.47, 4.38) |
| 1970 | 1.14 (0.39, 3.34) |
| 1975 | 1.00 |
| 1980 | 0.90 (0.29, 2.76) |
| 1985 | 0.74 (0.21, 2.59) |
| 1990 | 0.59 (0.14, 2.45) |
| 1995 | 0.55 (0.11, 2.80) |
| 2000 | 0.54 (0.07, 3.90) |
| 2005 | 0.48 (0.03, 7.97) |
| LRIs, Lower Respiratory Infections; WCBA, women of Childbearing Age | |

| Table B.7 Age effect on DALYs of LRIs attributed to ambient particulate matter pollution among WCBA globally from 1990 to 2021 | |
| --- | --- |
| Age, Years | Rate Ratio (95% CI) |
| 17.5 | 1.05 (0.82, 1.36) |
| 22.5 | 1.03 (0.81, 1.31) |
| 27.5 | 1.01 (0.80, 1.28) |
| 32.5 | 1.00 |
| 37.5 | 1.16 (0.93, 1.45) |
| 42.5 | 1.38 (1.10, 1.73) |
| 47.5 | 1.67 (1.33, 2.11) |
| DALYs, Disability - Adjusted Life Years; LRIs, Lower Respiratory Infections; WCBA, women of Childbearing Age | |

| Table B.8 Age effect on DALYs of LRIs attributed to household air pollution from solid fuels among WCBA globally from 1990 to 2021 | |
| --- | --- |
| Age, Years | Rate Ratio (95% CI) |
| 17.5 | 1.63 (1.39, 1.90) |
| 22.5 | 1.35 (1.17, 1.57) |
| 27.5 | 1.28 (1.12, 1.48) |
| 32.5 | 1 |
| 37.5 | 0.98 (0.85, 1.13) |
| 42.5 | 1.02 (0.88, 1.18) |
| 47.5 | 1.05 (0.90, 1.23) |
| DALYs, Disability - Adjusted Life Years; LRIs, Lower Respiratory Infections; WCBA, women of Childbearing Age | |

| Table B.9 Period effect on DALYs of LRIs attributed to ambient particulate matter pollution among WCBA globally from 1990 to 2021 | |
| --- | --- |
| Period | Rate Ratio (95% CI) |
| 1992.5 | 1.16 (0.92, 1.46) |
| 1997.5 | 1.12 (0.90, 1.40) |
| 2002.5 | 1.04 (0.84, 1.29) |
| 2007.5 | 1.00 |
| 2012.5 | 0.88 (0.71, 1.09) |
| 2017.5 | 0.86 (0.69, 1.07) |
| 2022.5 | 0.75 (0.60, 1.93) |
| DALYs, Disability - Adjusted Life Years; LRIs, Lower Respiratory Infections; WCBA, women of Childbearing Age | |

| Table B.10 Period effect on DALYs of LRIs attributed to household air pollution from solid fuels among WCBA globally from 1990 to 2021 | |
| --- | --- |
| Period | Rate Ratio (95% CI) |
| 1992.5 | 1.43 (1.25, 1.64) |
| 1997.5 | 1.36 (1.19, 1.55) |
| 2002.5 | 1.19 (1.05, 1.36) |
| 2007.5 | 1.00 |
| 2012.5 | 0.79 (0.68, 0.91) |
| 2017.5 | 0.61 (0.53, 0.71) |
| 2022.5 | 0.51 (0.43, 0.59) |
| DALYs, Disability - Adjusted Life Years; LRIs, Lower Respiratory Infections; WCBA, women of Childbearing Age | |

| Table B.11 Cohort effect on DALYs of LRIs attributed to ambient particulate matter pollution among WCBA globally from 1990 to 2021 | |
| --- | --- |
| Cohort | Rate Ratio (95% CI) |
| 1945 | 2.04 (1.34, 3.11) |
| 1950 | 1.71 (1.25, 2.35) |
| 1955 | 1.43 (1.09, 1.88) |
| 1960 | 1.30 (1.01, 1.68) |
| 1965 | 1.15 (0.90, 1.45) |
| 1970 | 1.00 (0.80, 1.26) |
| 1975 | 1.00 |
| 1980 | 1.01 (0.81, 1.26) |
| 1985 | 0.92 (0.72, 1.17) |
| 1990 | 0.79 (0.60, 1.04) |
| 1995 | 0.79 (0.58, 1.07) |
| 2000 | 0.82 (0.57, 1.18) |
| 2005 | 0.78 (0.47, 1.30) |
| DALYs, Disability - Adjusted Life Years; LRIs, Lower Respiratory Infections; WCBA, women of Childbearing Age | |

| Table B.12 Cohort effect on DALYs of LRIs attributed to household air pollution from solid fuels among WCBA globally from 1990 to 2021 | |
| --- | --- |
| Cohort | Rate Ratio (95% CI) |
| 1945 | 5.00 (3.88, 6.44) |
| 1950 | 3.40 (2.79, 4.14) |
| 1955 | 2.40 (2.02, 2.86) |
| 1960 | 1.88 (1.60, 2.20) |
| 1965 | 1.44 (1.24, 1.67) |
| 1970 | 1.14 (0.99, 1.31) |
| 1975 | 1.00 |
| 1980 | 0.90 (0.78, 1.04) |
| 1985 | 0.74 (0.63, 0.87) |
| 1990 | 0.59 (0.50, 0.71) |
| 1995 | 0.55 (0.45, 0.68) |
| 2000 | 0.54 (0.42, 0.68) |
| 2005 | 0.48 (0.34, 0.67) |
| DALYs, Disability - Adjusted Life Years; LRIs, Lower Respiratory Infections; WCBA, women of Childbearing Age | |

| Table C.1 Concentration Index of health inequality in LRIs among WCBA | | | | | |
| --- | --- | --- | --- | --- | --- |
|  |  | year | CI | lower | upper |
| Deaths | Ambient | 1990 | 0.16 | 0.06 | 0.26 |
| 2021 | 0.23 | 0.13 | 0.33 |
| Household | 1990 | 0.59 | 0.41 | 0.77 |
| 2021 | 0.72 | 0.54 | 0.9 |
| DALYs | Ambient | 1990 | 0.12 | -0.02 | 0.26 |
| 2021 | 0.22 | 0.08 | 0.36 |
| Household | 1990 | 0.60 | 0.43 | 0.77 |
| 2021 | 0.72 | 0.55 | 0.89 |
| LRIs, Lower Respiratory Infections; DALYs, Disability - Adjusted Life Years; WCBA, women of Childbearing Age; CI, Concentration Index | | | | | |

| Table C.2 SII of health inequality of deaths in LRIs attributed to ambient particulate matter pollution among WCBA | | | |
| --- | --- | --- | --- |
| year | SII | lower | upper |
| 1990 | -0.36 | -0.48 | -0.24 |
| 1991 | -0.34 | -0.46 | -0.22 |
| 1992 | -0.33 | -0.45 | -0.22 |
| 1993 | -0.32 | -0.44 | -0.20 |
| 1994 | -0.29 | -0.41 | -0.17 |
| 1995 | -0.28 | -0.40 | -0.16 |
| 1996 | -0.30 | -0.42 | -0.17 |
| 1997 | -0.31 | -0.44 | -0.19 |
| 1998 | -0.35 | -0.47 | -0.23 |
| 1999 | -0.36 | -0.48 | -0.24 |
| 2000 | -0.38 | -0.50 | -0.26 |
| 2001 | -0.38 | -0.50 | -0.26 |
| 2002 | -0.38 | -0.50 | -0.26 |
| 2003 | -0.36 | -0.48 | -0.24 |
| 2004 | -0.35 | -0.47 | -0.23 |
| 2005 | -0.35 | -0.46 | -0.23 |
| 2006 | -0.35 | -0.46 | -0.24 |
| 2007 | -0.36 | -0.47 | -0.25 |
| 2008 | -0.35 | -0.46 | -0.24 |
| 2009 | -0.35 | -0.46 | -0.23 |
| 2010 | -0.36 | -0.47 | -0.25 |
| 2011 | -0.37 | -0.48 | -0.26 |
| 2012 | -0.40 | -0.51 | -0.29 |
| 2013 | -0.42 | -0.54 | -0.31 |
| 2014 | -0.46 | -0.58 | -0.34 |
| 2015 | -0.46 | -0.58 | -0.34 |
| 2016 | -0.45 | -0.57 | -0.33 |
| 2017 | -0.43 | -0.54 | -0.32 |
| 2018 | -0.40 | -0.51 | -0.30 |
| 2019 | -0.39 | -0.49 | -0.28 |
| 2020 | -0.38 | -0.48 | -0.29 |
| 2021 | -0.36 | -0.45 | -0.28 |
| LRIs, Lower Respiratory Infections; WCBA, women of Childbearing Age; SII, slope index of inequality | | | |

| Table C.3 SII of health inequality of deaths in LRIs attributed to household air pollution from solid fuels among WCBA | | | |
| --- | --- | --- | --- |
| year | SII | lower | upper |
| 1990 | -5.46 | -5.96 | -4.96 |
| 1991 | -5.40 | -5.89 | -4.90 |
| 1992 | -5.39 | -5.88 | -4.90 |
| 1993 | -5.36 | -5.82 | -4.90 |
| 1994 | -5.26 | -5.72 | -4.81 |
| 1995 | -5.11 | -5.56 | -4.66 |
| 1996 | -5.00 | -5.45 | -4.55 |
| 1997 | -4.91 | -5.37 | -4.45 |
| 1998 | -4.86 | -5.31 | -4.41 |
| 1999 | -4.81 | -5.29 | -4.34 |
| 2000 | -4.77 | -5.21 | -4.32 |
| 2001 | -4.72 | -5.16 | -4.28 |
| 2002 | -4.62 | -5.05 | -4.18 |
| 2003 | -4.57 | -4.98 | -4.15 |
| 2004 | -4.42 | -4.82 | -4.01 |
| 2005 | -4.25 | -4.67 | -3.84 |
| 2006 | -4.03 | -4.41 | -3.64 |
| 2007 | -3.99 | -4.44 | -3.53 |
| 2008 | -3.86 | -4.32 | -3.40 |
| 2009 | -3.78 | -4.24 | -3.32 |
| 2010 | -3.69 | -4.14 | -3.24 |
| 2011 | -3.56 | -3.98 | -3.13 |
| 2012 | -3.42 | -3.83 | -3.00 |
| 2013 | -3.40 | -3.81 | -2.99 |
| 2014 | -3.41 | -3.83 | -3.00 |
| 2015 | -3.35 | -3.76 | -2.94 |
| 2016 | -3.27 | -3.69 | -2.86 |
| 2017 | -3.20 | -3.61 | -2.80 |
| 2018 | -3.14 | -3.54 | -2.75 |
| 2019 | -3.12 | -3.50 | -2.74 |
| 2020 | -2.88 | -3.22 | -2.53 |
| 2021 | -2.84 | -3.18 | -2.50 |
| LRIs, Lower Respiratory Infections; WCBA, women of Childbearing Age; SII, slope index of inequality | | | |

| Table C.4 SII of health inequality of DALYs in LRIs attributed to ambient particulate matter pollution among WCBA | | | |
| --- | --- | --- | --- |
| year | SII | lower | upper |
| 1990 | -1.45 | -2.58 | -0.32 |
| 1991 | -1.46 | -2.60 | -0.32 |
| 1992 | -1.46 | -2.57 | -0.35 |
| 1993 | -1.41 | -2.52 | -0.30 |
| 1994 | -1.40 | -2.50 | -0.31 |
| 1995 | -1.43 | -2.52 | -0.34 |
| 1996 | -1.41 | -2.49 | -0.34 |
| 1997 | -1.49 | -2.56 | -0.41 |
| 1998 | -1.56 | -2.62 | -0.50 |
| 1999 | -1.67 | -2.72 | -0.63 |
| 2000 | -1.80 | -2.84 | -0.76 |
| 2001 | -1.91 | -2.95 | -0.87 |
| 2002 | -2.00 | -3.04 | -0.96 |
| 2003 | -2.06 | -3.11 | -1.00 |
| 2004 | -2.09 | -3.15 | -1.04 |
| 2005 | -2.12 | -3.20 | -1.04 |
| 2006 | -2.25 | -3.33 | -1.17 |
| 2007 | -2.33 | -3.39 | -1.26 |
| 2008 | -2.29 | -3.37 | -1.22 |
| 2009 | -2.32 | -3.42 | -1.22 |
| 2010 | -2.48 | -3.59 | -1.37 |
| 2011 | -2.51 | -3.58 | -1.43 |
| 2012 | -2.65 | -3.72 | -1.58 |
| 2013 | -2.75 | -3.84 | -1.67 |
| 2014 | -2.88 | -3.96 | -1.80 |
| 2015 | -2.90 | -3.96 | -1.85 |
| 2016 | -2.91 | -3.97 | -1.86 |
| 2017 | -3.00 | -4.05 | -1.95 |
| 2018 | -3.01 | -4.07 | -1.95 |
| 2019 | -3.03 | -4.12 | -1.95 |
| 2020 | -3.25 | -4.32 | -2.18 |
| 2021 | -3.26 | -4.35 | -2.18 |
| LRIs, Lower Respiratory Infections; DALYs, Disability - Adjusted Life Years; WCBA, women of Childbearing Age; SII, slope index of inequality | | | |

| Table C.5 SII of health inequality of DALYs in LRIs attributed to household air pollution from solid fuels among WCBA | | | |
| --- | --- | --- | --- |
| year | SII | lower | upper |
| 1990 | -325.20 | -354.61 | -295.80 |
| 1991 | -321.36 | -350.91 | -291.80 |
| 1992 | -320.72 | -350.12 | -291.32 |
| 1993 | -318.81 | -347.12 | -290.49 |
| 1994 | -310.68 | -337.61 | -283.74 |
| 1995 | -302.53 | -329.42 | -275.63 |
| 1996 | -297.20 | -324.32 | -270.07 |
| 1997 | -291.31 | -318.17 | -264.45 |
| 1998 | -288.91 | -315.13 | -262.68 |
| 1999 | -288.79 | -316.53 | -261.06 |
| 2000 | -286.41 | -312.39 | -260.43 |
| 2001 | -283.04 | -309.79 | -256.30 |
| 2002 | -275.73 | -301.05 | -250.40 |
| 2003 | -272.13 | -296.87 | -247.38 |
| 2004 | -263.18 | -287.42 | -238.95 |
| 2005 | -253.69 | -279.06 | -228.32 |
| 2006 | -241.54 | -265.72 | -217.36 |
| 2007 | -238.18 | -264.37 | -211.98 |
| 2008 | -231.35 | -258.82 | -203.89 |
| 2009 | -225.79 | -253.29 | -198.30 |
| 2010 | -220.21 | -246.78 | -193.63 |
| 2011 | -212.25 | -237.65 | -186.86 |
| 2012 | -203.12 | -227.67 | -178.58 |
| 2013 | -201.71 | -226.35 | -177.06 |
| 2014 | -201.50 | -225.81 | -177.19 |
| 2015 | -197.11 | -221.46 | -172.75 |
| 2016 | -192.33 | -216.19 | -168.47 |
| 2017 | -188.60 | -212.08 | -165.12 |
| 2018 | -184.11 | -206.94 | -161.28 |
| 2019 | -182.71 | -204.57 | -160.86 |
| 2020 | -168.99 | -188.80 | -149.18 |
| 2021 | -167.44 | -186.93 | -147.95 |
| LRIs, Lower Respiratory Infections; DALYs, Disability - Adjusted Life Years; WCBA, women of Childbearing Age; SII, slope index of inequality | | | |

| Table D.1 Frontier analysis of deaths in LRIs attributed to ambient particulate matter pollution among WCBA in 204 countries and territories, 2021 | | | | | | |
| --- | --- | --- | --- | --- | --- | --- |
| location | year | ASR | SDI | frontier | effective difference | trend |
| South Africa | 2021 | 2.816 | 0.680 | 0.052 | 2.765 | Decrease |
| Eswatini | 2021 | 2.378 | 0.585 | 0.052 | 2.326 | Increase |
| Botswana | 2021 | 1.904 | 0.643 | 0.052 | 1.852 | Increase |
| Equatorial Guinea | 2021 | 1.873 | 0.658 | 0.052 | 1.821 | Increase |
| Saudi Arabia | 2021 | 1.790 | 0.815 | 0.007 | 1.783 | Decrease |
| Namibia | 2021 | 1.737 | 0.618 | 0.052 | 1.686 | Increase |
| Gabon | 2021 | 1.357 | 0.635 | 0.052 | 1.305 | Decrease |
| DR Congo | 2021 | 1.358 | 0.383 | 0.069 | 1.289 | Increase |
| Djibouti | 2021 | 1.304 | 0.488 | 0.052 | 1.252 | Increase |
| Egypt | 2021 | 1.219 | 0.607 | 0.052 | 1.167 | Decrease |
| Mauritania | 2021 | 1.184 | 0.499 | 0.052 | 1.133 | Decrease |
| Angola | 2021 | 1.178 | 0.454 | 0.052 | 1.126 | Increase |
| Lesotho | 2021 | 1.156 | 0.510 | 0.052 | 1.104 | Increase |
| Guinea-Bissau | 2021 | 1.167 | 0.353 | 0.081 | 1.086 | Decrease |
| Peru | 2021 | 1.125 | 0.662 | 0.052 | 1.073 | Decrease |
| Malaysia | 2021 | 0.961 | 0.743 | 0.028 | 0.933 | Decrease |
| Eritrea | 2021 | 0.987 | 0.404 | 0.069 | 0.918 | Decrease |
| The Gambia | 2021 | 0.946 | 0.410 | 0.061 | 0.884 | Decrease |
| Sao Tome and Principe | 2021 | 0.894 | 0.505 | 0.052 | 0.842 | Increase |
| Guyana | 2021 | 0.881 | 0.651 | 0.052 | 0.829 | Increase |
| Cabo Verde | 2021 | 0.871 | 0.534 | 0.052 | 0.819 | Increase |
| Ghana | 2021 | 0.844 | 0.565 | 0.052 | 0.793 | Decrease |
| Thailand | 2021 | 0.831 | 0.683 | 0.052 | 0.780 | Increase |
| Libya | 2021 | 0.823 | 0.726 | 0.052 | 0.771 | Increase |
| Grenada | 2021 | 0.822 | 0.669 | 0.052 | 0.770 | Decrease |
| Chad | 2021 | 0.882 | 0.240 | 0.136 | 0.746 | Increase |
| Bolivia | 2021 | 0.789 | 0.599 | 0.052 | 0.738 | Decrease |
| Togo | 2021 | 0.798 | 0.409 | 0.061 | 0.737 | Decrease |
| Philippines | 2021 | 0.788 | 0.651 | 0.052 | 0.736 | Decrease |
| Guinea | 2021 | 0.824 | 0.336 | 0.094 | 0.729 | Decrease |
| Cote d'Ivoire | 2021 | 0.783 | 0.426 | 0.057 | 0.725 | Decrease |
| Afghanistan | 2021 | 0.801 | 0.337 | 0.094 | 0.706 | Decrease |
| Guatemala | 2021 | 0.755 | 0.540 | 0.052 | 0.703 | Decrease |
| Cameroon | 2021 | 0.752 | 0.480 | 0.052 | 0.700 | Decrease |
| Turkmenistan | 2021 | 0.738 | 0.682 | 0.052 | 0.686 | Decrease |
| Nigeria | 2021 | 0.716 | 0.503 | 0.052 | 0.665 | Decrease |
| Zimbabwe | 2021 | 0.713 | 0.474 | 0.052 | 0.661 | Increase |
| Uzbekistan | 2021 | 0.684 | 0.663 | 0.052 | 0.632 | Decrease |
| Mali | 2021 | 0.716 | 0.269 | 0.125 | 0.590 | Decrease |
| Tajikistan | 2021 | 0.618 | 0.542 | 0.052 | 0.567 | Decrease |
| Saint Vincent and the Grenadines | 2021 | 0.614 | 0.637 | 0.052 | 0.562 | Increase |
| Sudan | 2021 | 0.602 | 0.542 | 0.052 | 0.550 | Increase |
| Belize | 2021 | 0.601 | 0.610 | 0.052 | 0.550 | Increase |
| Suriname | 2021 | 0.597 | 0.634 | 0.052 | 0.545 | Decrease |
| Syria | 2021 | 0.593 | 0.623 | 0.052 | 0.541 | Decrease |
| Sierra Leone | 2021 | 0.618 | 0.359 | 0.081 | 0.537 | Increase |
| Central African Republic | 2021 | 0.633 | 0.309 | 0.099 | 0.534 | Decrease |
| Marshall Islands | 2021 | 0.579 | 0.574 | 0.052 | 0.527 | Increase |
| Nauru | 2021 | 0.568 | 0.625 | 0.052 | 0.516 | Decrease |
| Zambia | 2021 | 0.565 | 0.506 | 0.052 | 0.513 | Decrease |
| South Sudan | 2021 | 0.619 | 0.278 | 0.114 | 0.505 | Decrease |
| Palau | 2021 | 0.521 | 0.754 | 0.027 | 0.494 | Increase |
| Ukraine | 2021 | 0.516 | 0.761 | 0.027 | 0.488 | Increase |
| India | 2021 | 0.539 | 0.575 | 0.052 | 0.487 | Increase |
| Fiji | 2021 | 0.534 | 0.675 | 0.052 | 0.482 | Increase |
| Argentina | 2021 | 0.527 | 0.723 | 0.052 | 0.476 | Increase |
| The Bahamas | 2021 | 0.479 | 0.805 | 0.007 | 0.472 | Decrease |
| Burkina Faso | 2021 | 0.579 | 0.285 | 0.107 | 0.472 | Decrease |
| Morocco | 2021 | 0.522 | 0.563 | 0.052 | 0.471 | Increase |
| Samoa | 2021 | 0.514 | 0.593 | 0.052 | 0.462 | Increase |
| Benin | 2021 | 0.526 | 0.373 | 0.069 | 0.456 | Decrease |
| Senegal | 2021 | 0.514 | 0.408 | 0.061 | 0.452 | Decrease |
| Federated States of Micronesia | 2021 | 0.500 | 0.588 | 0.052 | 0.449 | Increase |
| Yemen | 2021 | 0.496 | 0.450 | 0.053 | 0.443 | Increase |
| Kuwait | 2021 | 0.449 | 0.847 | 0.007 | 0.442 | Decrease |
| Kazakhstan | 2021 | 0.494 | 0.725 | 0.052 | 0.442 | Decrease |
| Iraq | 2021 | 0.493 | 0.663 | 0.052 | 0.441 | Decrease |
| Tokelau | 2021 | 0.489 | 0.686 | 0.052 | 0.438 | Decrease |
| Algeria | 2021 | 0.487 | 0.660 | 0.052 | 0.435 | Decrease |
| Oman | 2021 | 0.451 | 0.773 | 0.023 | 0.427 | Decrease |
| Laos | 2021 | 0.476 | 0.489 | 0.052 | 0.424 | Decrease |
| Trinidad and Tobago | 2021 | 0.441 | 0.769 | 0.024 | 0.417 | Decrease |
| Lebanon | 2021 | 0.432 | 0.745 | 0.027 | 0.405 | Decrease |
| Mongolia | 2021 | 0.456 | 0.618 | 0.052 | 0.404 | Increase |
| Liberia | 2021 | 0.489 | 0.352 | 0.088 | 0.401 | Decrease |
| Romania | 2021 | 0.422 | 0.768 | 0.024 | 0.398 | Decrease |
| Niue | 2021 | 0.425 | 0.726 | 0.031 | 0.394 | Increase |
| Bulgaria | 2021 | 0.415 | 0.768 | 0.024 | 0.390 | Decrease |
| Kenya | 2021 | 0.433 | 0.524 | 0.052 | 0.381 | Increase |
| United Arab Emirates | 2021 | 0.386 | 0.849 | 0.007 | 0.379 | Decrease |
| Mexico | 2021 | 0.425 | 0.665 | 0.052 | 0.374 | Decrease |
| Bahrain | 2021 | 0.389 | 0.753 | 0.027 | 0.361 | Decrease |
| Venezuela | 2021 | 0.410 | 0.597 | 0.052 | 0.359 | Decrease |
| El Salvador | 2021 | 0.407 | 0.564 | 0.052 | 0.355 | Increase |
| Congo (Brazzaville) | 2021 | 0.401 | 0.583 | 0.052 | 0.350 | Decrease |
| Ecuador | 2021 | 0.399 | 0.661 | 0.052 | 0.347 | Decrease |
| Cuba | 2021 | 0.398 | 0.669 | 0.052 | 0.347 | Increase |
| Seychelles | 2021 | 0.373 | 0.730 | 0.030 | 0.344 | Decrease |
| Niger | 2021 | 0.702 | 0.168 | 0.359 | 0.344 | Decrease |
| Saint Lucia | 2021 | 0.391 | 0.673 | 0.052 | 0.339 | Decrease |
| Cambodia | 2021 | 0.390 | 0.474 | 0.052 | 0.339 | Decrease |
| Iran | 2021 | 0.387 | 0.697 | 0.052 | 0.336 | Decrease |
| Brazil | 2021 | 0.379 | 0.653 | 0.052 | 0.327 | Decrease |
| Jordan | 2021 | 0.377 | 0.725 | 0.052 | 0.325 | Decrease |
| Russia | 2021 | 0.326 | 0.809 | 0.007 | 0.319 | Increase |
| Palestine | 2021 | 0.368 | 0.631 | 0.052 | 0.316 | Decrease |
| Dominica | 2021 | 0.339 | 0.747 | 0.027 | 0.312 | Increase |
| Solomon Islands | 2021 | 0.368 | 0.429 | 0.056 | 0.312 | Increase |
| Barbados | 2021 | 0.337 | 0.747 | 0.027 | 0.310 | Decrease |
| Tonga | 2021 | 0.360 | 0.626 | 0.052 | 0.309 | Increase |
| Azerbaijan | 2021 | 0.358 | 0.695 | 0.052 | 0.306 | Decrease |
| Moldova | 2021 | 0.335 | 0.732 | 0.030 | 0.306 | Decrease |
| Timor-Leste | 2021 | 0.349 | 0.445 | 0.053 | 0.296 | Increase |
| Poland | 2021 | 0.302 | 0.812 | 0.007 | 0.296 | Decrease |
| Georgia | 2021 | 0.303 | 0.790 | 0.010 | 0.293 | Decrease |
| Uganda | 2021 | 0.346 | 0.423 | 0.057 | 0.288 | Increase |
| Tunisia | 2021 | 0.339 | 0.682 | 0.052 | 0.287 | Decrease |
| American Samoa | 2021 | 0.335 | 0.724 | 0.052 | 0.283 | Increase |
| Turkey | 2021 | 0.287 | 0.929 | 0.007 | 0.280 | Decrease |
| Dominican Republic | 2021 | 0.330 | 0.619 | 0.052 | 0.279 | Increase |
| Antigua and Barbuda | 2021 | 0.302 | 0.750 | 0.027 | 0.275 | Decrease |
| Belarus | 2021 | 0.285 | 0.784 | 0.013 | 0.273 | Decrease |
| Chile | 2021 | 0.291 | 0.772 | 0.023 | 0.268 | Decrease |
| Slovakia | 2021 | 0.270 | 0.811 | 0.007 | 0.263 | Decrease |
| Burundi | 2021 | 0.369 | 0.289 | 0.107 | 0.262 | Decrease |
| Bhutan | 2021 | 0.311 | 0.473 | 0.052 | 0.260 | Increase |
| Northern Mariana Islands | 2021 | 0.275 | 0.772 | 0.023 | 0.252 | Decrease |
| Armenia | 2021 | 0.299 | 0.702 | 0.052 | 0.248 | Decrease |
| Myanmar | 2021 | 0.285 | 0.534 | 0.052 | 0.233 | Decrease |
| Tanzania | 2021 | 0.285 | 0.447 | 0.053 | 0.232 | Decrease |
| Ethiopia | 2021 | 0.312 | 0.359 | 0.081 | 0.231 | Decrease |
| Madagascar | 2021 | 0.294 | 0.400 | 0.069 | 0.224 | Increase |
| Colombia | 2021 | 0.272 | 0.655 | 0.052 | 0.221 | Decrease |
| Haiti | 2021 | 0.273 | 0.448 | 0.053 | 0.220 | Decrease |
| Guam | 2021 | 0.214 | 0.804 | 0.007 | 0.207 | Decrease |
| Vanuatu | 2021 | 0.258 | 0.473 | 0.052 | 0.206 | Increase |
| Nepal | 2021 | 0.256 | 0.433 | 0.056 | 0.200 | Decrease |
| Rwanda | 2021 | 0.253 | 0.436 | 0.054 | 0.199 | Decrease |
| Kyrgyzstan | 2021 | 0.248 | 0.604 | 0.052 | 0.196 | Decrease |
| Malawi | 2021 | 0.266 | 0.385 | 0.069 | 0.196 | Decrease |
| Sri Lanka | 2021 | 0.247 | 0.702 | 0.052 | 0.196 | Increase |
| Czechia | 2021 | 0.198 | 0.828 | 0.007 | 0.191 | Decrease |
| Qatar | 2021 | 0.193 | 0.847 | 0.007 | 0.186 | Decrease |
| Honduras | 2021 | 0.234 | 0.513 | 0.052 | 0.182 | Decrease |
| Pakistan | 2021 | 0.234 | 0.504 | 0.052 | 0.182 | Increase |
| Latvia | 2021 | 0.187 | 0.831 | 0.007 | 0.180 | Decrease |
| Singapore | 2021 | 0.185 | 0.856 | 0.007 | 0.178 | Decrease |
| Papua New Guinea | 2021 | 0.219 | 0.418 | 0.059 | 0.160 | Decrease |
| Cook Islands | 2021 | 0.178 | 0.779 | 0.021 | 0.157 | Decrease |
| Comoros | 2021 | 0.207 | 0.476 | 0.052 | 0.156 | Decrease |
| Mozambique | 2021 | 0.242 | 0.326 | 0.094 | 0.147 | Decrease |
| Indonesia | 2021 | 0.193 | 0.657 | 0.052 | 0.142 | Decrease |
| Lithuania | 2021 | 0.143 | 0.856 | 0.007 | 0.136 | Decrease |
| Tuvalu | 2021 | 0.186 | 0.577 | 0.052 | 0.134 | Increase |
| Kiribati | 2021 | 0.184 | 0.527 | 0.052 | 0.132 | Increase |
| Panama | 2021 | 0.182 | 0.709 | 0.052 | 0.131 | Decrease |
| Mauritius | 2021 | 0.182 | 0.718 | 0.052 | 0.131 | Decrease |
| Paraguay | 2021 | 0.182 | 0.636 | 0.052 | 0.130 | Increase |
| Uruguay | 2021 | 0.182 | 0.719 | 0.052 | 0.130 | Increase |
| Jamaica | 2021 | 0.179 | 0.683 | 0.052 | 0.128 | Increase |
| Slovenia | 2021 | 0.132 | 0.842 | 0.007 | 0.125 | Decrease |
| Costa Rica | 2021 | 0.176 | 0.700 | 0.052 | 0.124 | Decrease |
| Taiwan (Province of China) | 2021 | 0.125 | 0.875 | 0.007 | 0.118 | Decrease |
| Albania | 2021 | 0.165 | 0.707 | 0.052 | 0.113 | Decrease |
| Serbia | 2021 | 0.121 | 0.792 | 0.010 | 0.111 | Decrease |
| Croatia | 2021 | 0.118 | 0.798 | 0.008 | 0.110 | Decrease |
| Hungary | 2021 | 0.098 | 0.791 | 0.010 | 0.088 | Decrease |
| North Macedonia | 2021 | 0.115 | 0.751 | 0.027 | 0.088 | Decrease |
| South Korea | 2021 | 0.091 | 0.887 | 0.007 | 0.084 | Decrease |
| Montenegro | 2021 | 0.091 | 0.796 | 0.009 | 0.082 | Decrease |
| UK | 2021 | 0.084 | 0.859 | 0.007 | 0.077 | Decrease |
| Somalia | 2021 | 0.435 | 0.078 | 0.359 | 0.076 | Decrease |
| Bosnia and Herzegovina | 2021 | 0.126 | 0.723 | 0.052 | 0.074 | Increase |
| Saint Kitts and Nevis | 2021 | 0.100 | 0.755 | 0.027 | 0.073 | Decrease |
| China | 2021 | 0.123 | 0.722 | 0.052 | 0.072 | Decrease |
| Monaco | 2021 | 0.076 | 0.908 | 0.007 | 0.069 | Decrease |
| Greece | 2021 | 0.079 | 0.792 | 0.010 | 0.069 | Decrease |
| Brunei | 2021 | 0.071 | 0.810 | 0.007 | 0.065 | Decrease |
| Malta | 2021 | 0.070 | 0.802 | 0.007 | 0.064 | Decrease |
| Greenland | 2021 | 0.065 | 0.826 | 0.007 | 0.058 | Decrease |
| Maldives | 2021 | 0.108 | 0.651 | 0.052 | 0.056 | Decrease |
| USA | 2021 | 0.061 | 0.862 | 0.007 | 0.054 | Decrease |
| Viet Nam | 2021 | 0.106 | 0.628 | 0.052 | 0.054 | Increase |
| Belgium | 2021 | 0.058 | 0.854 | 0.007 | 0.051 | Decrease |
| North Korea | 2021 | 0.101 | 0.570 | 0.052 | 0.049 | Decrease |
| Estonia | 2021 | 0.054 | 0.845 | 0.007 | 0.047 | Decrease |
| Japan | 2021 | 0.051 | 0.871 | 0.007 | 0.044 | Decrease |
| Netherlands | 2021 | 0.048 | 0.888 | 0.007 | 0.041 | Decrease |
| Israel | 2021 | 0.046 | 0.809 | 0.007 | 0.039 | Decrease |
| Nicaragua | 2021 | 0.090 | 0.524 | 0.052 | 0.039 | Decrease |
| Italy | 2021 | 0.039 | 0.806 | 0.007 | 0.033 | Decrease |
| Ireland | 2021 | 0.039 | 0.874 | 0.007 | 0.032 | Decrease |
| Bangladesh | 2021 | 0.083 | 0.492 | 0.052 | 0.031 | Decrease |
| Germany | 2021 | 0.037 | 0.903 | 0.007 | 0.030 | Decrease |
| Virgin Islands | 2021 | 0.037 | 0.822 | 0.007 | 0.030 | Decrease |
| Denmark | 2021 | 0.034 | 0.896 | 0.007 | 0.027 | Decrease |
| Bermuda | 2021 | 0.033 | 0.821 | 0.007 | 0.026 | Decrease |
| Puerto Rico | 2021 | 0.033 | 0.826 | 0.007 | 0.026 | Decrease |
| France | 2021 | 0.029 | 0.838 | 0.007 | 0.022 | Decrease |
| Australia | 2021 | 0.029 | 0.844 | 0.007 | 0.022 | Decrease |
| Cyprus | 2021 | 0.028 | 0.836 | 0.007 | 0.021 | Decrease |
| Canada | 2021 | 0.026 | 0.873 | 0.007 | 0.020 | Decrease |
| Portugal | 2021 | 0.040 | 0.744 | 0.027 | 0.013 | Decrease |
| Switzerland | 2021 | 0.018 | 0.933 | 0.007 | 0.011 | Decrease |
| Austria | 2021 | 0.018 | 0.854 | 0.007 | 0.011 | Decrease |
| Luxembourg | 2021 | 0.016 | 0.884 | 0.007 | 0.010 | Decrease |
| Iceland | 2021 | 0.016 | 0.876 | 0.007 | 0.009 | Decrease |
| Andorra | 2021 | 0.015 | 0.869 | 0.007 | 0.009 | Decrease |
| San Marino | 2021 | 0.012 | 0.888 | 0.007 | 0.005 | Decrease |
| New Zealand | 2021 | 0.012 | 0.849 | 0.007 | 0.005 | Decrease |
| Finland | 2021 | 0.011 | 0.860 | 0.007 | 0.004 | Decrease |
| Spain | 2021 | 0.027 | 0.769 | 0.024 | 0.002 | Decrease |
| Norway | 2021 | 0.008 | 0.916 | 0.007 | 0.001 | Decrease |
| Sweden | 2021 | 0.008 | 0.887 | 0.007 | 0.001 | Decrease |
| LRIs, Lower Respiratory Infections; WCBA, women of Childbearing Age; ASR, Age-Standardized Rate; SDI, Socio-Demographic Index | | | | | | |

| Table D.2 Frontier analysis of deaths in LRIs attributed to household air pollution from solid fuels among WCBA in 204 countries and territories, 2021 | | | | | | | |
| --- | --- | --- | --- | --- | --- | --- | --- |
| location | year | ASR | SDI | frontier | effective difference | trend |
| Lesotho | 2021 | 7.581 | 0.510 | 0.008 | 7.573 | Increase |
| Niger | 2021 | 4.088 | 0.168 | 4.088 | 0.000 | Decrease |
| Somalia | 2021 | 7.737 | 0.078 | 7.714 | 0.022 | Decrease |
| Bhutan | 2021 | 0.118 | 0.473 | 0.020 | 0.098 | Decrease |
| Bangladesh | 2021 | 0.465 | 0.492 | 0.017 | 0.448 | Decrease |
| Yemen | 2021 | 0.631 | 0.450 | 0.023 | 0.608 | Decrease |
| Nepal | 2021 | 0.845 | 0.433 | 0.029 | 0.815 | Decrease |
| Congo (Brazzaville) | 2021 | 5.409 | 0.583 | 0.003 | 5.406 | Decrease |
| Djibouti | 2021 | 1.014 | 0.488 | 0.017 | 0.996 | Decrease |
| Timor-Leste | 2021 | 1.327 | 0.445 | 0.023 | 1.304 | Decrease |
| Angola | 2021 | 1.376 | 0.454 | 0.023 | 1.353 | Decrease |
| Mauritania | 2021 | 1.543 | 0.499 | 0.016 | 1.527 | Decrease |
| Laos | 2021 | 1.630 | 0.489 | 0.017 | 1.613 | Decrease |
| Papua New Guinea | 2021 | 2.119 | 0.418 | 0.140 | 1.979 | Decrease |
| DR Congo | 2021 | 2.635 | 0.383 | 0.495 | 2.141 | Decrease |
| Mali | 2021 | 3.489 | 0.269 | 1.260 | 2.229 | Decrease |
| Benin | 2021 | 2.896 | 0.373 | 0.550 | 2.346 | Decrease |
| Cote d'Ivoire | 2021 | 2.526 | 0.426 | 0.140 | 2.386 | Decrease |
| Burkina Faso | 2021 | 3.446 | 0.285 | 1.052 | 2.393 | Decrease |
| Cambodia | 2021 | 2.511 | 0.474 | 0.020 | 2.491 | Decrease |
| Ethiopia | 2021 | 3.215 | 0.359 | 0.608 | 2.607 | Decrease |
| Senegal | 2021 | 2.965 | 0.408 | 0.270 | 2.695 | Decrease |
| Zambia | 2021 | 3.443 | 0.506 | 0.009 | 3.434 | Decrease |
| Uganda | 2021 | 3.027 | 0.423 | 0.140 | 2.887 | Decrease |
| Sao Tome and Principe | 2021 | 3.251 | 0.505 | 0.009 | 3.242 | Decrease |
| Cameroon | 2021 | 2.908 | 0.480 | 0.017 | 2.891 | Decrease |
| Eswatini | 2021 | 2.965 | 0.585 | 0.003 | 2.963 | Decrease |
| Tanzania | 2021 | 3.037 | 0.447 | 0.023 | 3.014 | Decrease |
| Kenya | 2021 | 2.897 | 0.524 | 0.007 | 2.891 | Decrease |
| Haiti | 2021 | 3.446 | 0.448 | 0.023 | 3.423 | Decrease |
| Marshall Islands | 2021 | 2.714 | 0.574 | 0.003 | 2.711 | Decrease |
| Chad | 2021 | 4.800 | 0.240 | 1.355 | 3.445 | Decrease |
| Mozambique | 2021 | 4.189 | 0.326 | 0.645 | 3.544 | Decrease |
| Kiribati | 2021 | 2.572 | 0.527 | 0.007 | 2.566 | Decrease |
| Samoa | 2021 | 2.528 | 0.593 | 0.003 | 2.526 | Decrease |
| Liberia | 2021 | 4.288 | 0.352 | 0.645 | 3.643 | Decrease |
| Vanuatu | 2021 | 3.730 | 0.473 | 0.020 | 3.710 | Decrease |
| Rwanda | 2021 | 3.743 | 0.436 | 0.029 | 3.714 | Decrease |
| Malawi | 2021 | 4.362 | 0.385 | 0.495 | 3.868 | Decrease |
| South Sudan | 2021 | 5.107 | 0.278 | 1.123 | 3.983 | Increase |
| Federated States of Micronesia | 2021 | 2.229 | 0.588 | 0.003 | 2.226 | Decrease |
| Comoros | 2021 | 4.064 | 0.476 | 0.017 | 4.047 | Decrease |
| Togo | 2021 | 4.576 | 0.409 | 0.270 | 4.306 | Decrease |
| Ghana | 2021 | 1.679 | 0.565 | 0.004 | 1.675 | Decrease |
| Sierra Leone | 2021 | 5.041 | 0.359 | 0.608 | 4.433 | Increase |
| Guinea | 2021 | 5.201 | 0.336 | 0.645 | 4.556 | Decrease |
| Namibia | 2021 | 1.469 | 0.618 | 0.002 | 1.468 | Decrease |
| Guatemala | 2021 | 1.371 | 0.540 | 0.006 | 1.365 | Decrease |
| The Gambia | 2021 | 4.827 | 0.410 | 0.270 | 4.557 | Decrease |
| Nigeria | 2021 | 1.336 | 0.503 | 0.016 | 1.320 | Decrease |
| Afghanistan | 2021 | 5.451 | 0.337 | 0.645 | 4.806 | Decrease |
| Tajikistan | 2021 | 1.185 | 0.542 | 0.006 | 1.179 | Decrease |
| Philippines | 2021 | 1.176 | 0.651 | 0.000 | 1.176 | Decrease |
| Tonga | 2021 | 1.071 | 0.626 | 0.002 | 1.069 | Decrease |
| Burundi | 2021 | 5.914 | 0.289 | 1.052 | 4.862 | Decrease |
| Tuvalu | 2021 | 0.973 | 0.577 | 0.003 | 0.970 | Decrease |
| Honduras | 2021 | 0.880 | 0.513 | 0.008 | 0.872 | Decrease |
| North Korea | 2021 | 0.873 | 0.570 | 0.003 | 0.870 | Decrease |
| India | 2021 | 0.865 | 0.575 | 0.003 | 0.862 | Decrease |
| Eritrea | 2021 | 6.184 | 0.404 | 0.296 | 5.888 | Decrease |
| South Africa | 2021 | 0.807 | 0.680 | 0.000 | 0.807 | Decrease |
| Myanmar | 2021 | 0.756 | 0.534 | 0.006 | 0.751 | Decrease |
| Sudan | 2021 | 0.726 | 0.542 | 0.006 | 0.720 | Decrease |
| Guinea-Bissau | 2021 | 7.101 | 0.353 | 0.645 | 6.456 | Decrease |
| Bolivia | 2021 | 0.498 | 0.599 | 0.003 | 0.496 | Decrease |
| Botswana | 2021 | 0.496 | 0.643 | 0.001 | 0.495 | Decrease |
| Fiji | 2021 | 0.490 | 0.675 | 0.000 | 0.490 | Decrease |
| Central African Republic | 2021 | 7.782 | 0.309 | 0.951 | 6.831 | Decrease |
| Kyrgyzstan | 2021 | 0.424 | 0.604 | 0.002 | 0.422 | Decrease |
| Pakistan | 2021 | 0.396 | 0.504 | 0.016 | 0.380 | Decrease |
| Cabo Verde | 2021 | 0.372 | 0.534 | 0.006 | 0.366 | Decrease |
| Nicaragua | 2021 | 0.335 | 0.524 | 0.007 | 0.328 | Decrease |
| Moldova | 2021 | 0.258 | 0.732 | 0.000 | 0.258 | Decrease |
| Sri Lanka | 2021 | 0.202 | 0.702 | 0.000 | 0.202 | Decrease |
| El Salvador | 2021 | 0.202 | 0.564 | 0.004 | 0.198 | Decrease |
| Mongolia | 2021 | 0.198 | 0.618 | 0.002 | 0.196 | Decrease |
| Peru | 2021 | 0.192 | 0.662 | 0.000 | 0.192 | Decrease |
| Paraguay | 2021 | 0.192 | 0.636 | 0.001 | 0.190 | Decrease |
| Belize | 2021 | 0.183 | 0.610 | 0.002 | 0.180 | Decrease |
| Viet Nam | 2021 | 0.176 | 0.628 | 0.002 | 0.175 | Decrease |
| Indonesia | 2021 | 0.165 | 0.657 | 0.000 | 0.165 | Decrease |
| Nauru | 2021 | 0.160 | 0.625 | 0.002 | 0.159 | Decrease |
| Uzbekistan | 2021 | 0.155 | 0.663 | 0.000 | 0.155 | Decrease |
| Guyana | 2021 | 0.148 | 0.651 | 0.000 | 0.148 | Decrease |
| Georgia | 2021 | 0.130 | 0.790 | 0.000 | 0.130 | Decrease |
| American Samoa | 2021 | 0.103 | 0.724 | 0.000 | 0.103 | Increase |
| Solomon Islands | 2021 | 6.872 | 0.429 | 0.029 | 6.843 | Decrease |
| Niue | 2021 | 0.097 | 0.726 | 0.000 | 0.097 | Decrease |
| Gabon | 2021 | 0.084 | 0.635 | 0.001 | 0.083 | Decrease |
| Brazil | 2021 | 0.079 | 0.653 | 0.000 | 0.079 | Decrease |
| Mexico | 2021 | 0.070 | 0.665 | 0.000 | 0.070 | Decrease |
| Albania | 2021 | 0.067 | 0.707 | 0.000 | 0.067 | Decrease |
| Thailand | 2021 | 0.065 | 0.683 | 0.000 | 0.065 | Decrease |
| Equatorial Guinea | 2021 | 0.062 | 0.658 | 0.000 | 0.062 | Decrease |
| Jamaica | 2021 | 0.062 | 0.683 | 0.000 | 0.062 | Decrease |
| Ukraine | 2021 | 0.056 | 0.761 | 0.000 | 0.056 | Increase |
| Bosnia and Herzegovina | 2021 | 0.049 | 0.723 | 0.000 | 0.049 | Decrease |
| Dominica | 2021 | 0.049 | 0.747 | 0.000 | 0.049 | Decrease |
| Ecuador | 2021 | 0.046 | 0.661 | 0.000 | 0.046 | Decrease |
| China | 2021 | 0.040 | 0.722 | 0.000 | 0.040 | Decrease |
| Morocco | 2021 | 0.043 | 0.563 | 0.004 | 0.039 | Decrease |
| Colombia | 2021 | 0.037 | 0.655 | 0.000 | 0.037 | Decrease |
| Bulgaria | 2021 | 0.036 | 0.768 | 0.000 | 0.036 | Decrease |
| Suriname | 2021 | 0.035 | 0.634 | 0.001 | 0.033 | Decrease |
| Saint Vincent and the Grenadines | 2021 | 0.031 | 0.637 | 0.001 | 0.029 | Decrease |
| Palestine | 2021 | 0.027 | 0.631 | 0.001 | 0.026 | Decrease |
| Romania | 2021 | 0.024 | 0.768 | 0.000 | 0.024 | Decrease |
| Dominican Republic | 2021 | 0.026 | 0.619 | 0.002 | 0.024 | Decrease |
| Madagascar | 2021 | 7.443 | 0.400 | 0.399 | 7.044 | Decrease |
| Montenegro | 2021 | 0.021 | 0.796 | 0.000 | 0.021 | Decrease |
| Serbia | 2021 | 0.020 | 0.792 | 0.000 | 0.020 | Decrease |
| Cuba | 2021 | 0.019 | 0.669 | 0.000 | 0.019 | Decrease |
| North Macedonia | 2021 | 0.018 | 0.751 | 0.000 | 0.018 | Decrease |
| Saint Lucia | 2021 | 0.018 | 0.673 | 0.000 | 0.018 | Decrease |
| Azerbaijan | 2021 | 0.017 | 0.695 | 0.000 | 0.017 | Decrease |
| Grenada | 2021 | 0.017 | 0.669 | 0.000 | 0.017 | Decrease |
| Armenia | 2021 | 0.016 | 0.702 | 0.000 | 0.016 | Decrease |
| Costa Rica | 2021 | 0.014 | 0.700 | 0.000 | 0.014 | Decrease |
| Maldives | 2021 | 0.013 | 0.651 | 0.000 | 0.013 | Decrease |
| Chile | 2021 | 0.013 | 0.772 | 0.000 | 0.013 | Decrease |
| Argentina | 2021 | 0.011 | 0.723 | 0.000 | 0.011 | Decrease |
| Latvia | 2021 | 0.011 | 0.831 | 0.000 | 0.011 | Decrease |
| Poland | 2021 | 0.011 | 0.812 | 0.000 | 0.011 | Decrease |
| Kazakhstan | 2021 | 0.010 | 0.725 | 0.000 | 0.010 | Decrease |
| Panama | 2021 | 0.010 | 0.709 | 0.000 | 0.010 | Decrease |
| Northern Mariana Islands | 2021 | 0.009 | 0.772 | 0.000 | 0.009 | Decrease |
| Cook Islands | 2021 | 0.008 | 0.779 | 0.000 | 0.008 | Decrease |
| Russia | 2021 | 0.006 | 0.809 | 0.000 | 0.006 | Decrease |
| Hungary | 2021 | 0.005 | 0.791 | 0.000 | 0.005 | Decrease |
| Venezuela | 2021 | 0.008 | 0.597 | 0.003 | 0.005 | Decrease |
| Uruguay | 2021 | 0.004 | 0.719 | 0.000 | 0.004 | Decrease |
| Estonia | 2021 | 0.003 | 0.845 | 0.000 | 0.003 | Decrease |
| Iraq | 2021 | 0.003 | 0.663 | 0.000 | 0.003 | Decrease |
| Tokelau | 2021 | 0.003 | 0.686 | 0.000 | 0.003 | Decrease |
| Libya | 2021 | 0.003 | 0.726 | 0.000 | 0.003 | Decrease |
| Malaysia | 2021 | 0.003 | 0.743 | 0.000 | 0.003 | Decrease |
| Croatia | 2021 | 0.003 | 0.798 | 0.000 | 0.003 | Decrease |
| Mauritius | 2021 | 0.003 | 0.718 | 0.000 | 0.003 | Decrease |
| Slovenia | 2021 | 0.002 | 0.842 | 0.000 | 0.002 | Decrease |
| Lebanon | 2021 | 0.002 | 0.745 | 0.000 | 0.002 | Decrease |
| Belarus | 2021 | 0.002 | 0.784 | 0.000 | 0.002 | Decrease |
| Lithuania | 2021 | 0.002 | 0.856 | 0.000 | 0.002 | Decrease |
| Guam | 2021 | 0.002 | 0.804 | 0.000 | 0.002 | Decrease |
| Turkey | 2021 | 0.002 | 0.929 | 0.000 | 0.002 | Decrease |
| The Bahamas | 2021 | 0.002 | 0.805 | 0.000 | 0.002 | Decrease |
| Syria | 2021 | 0.003 | 0.623 | 0.002 | 0.002 | Decrease |
| Saint Kitts and Nevis | 2021 | 0.001 | 0.755 | 0.000 | 0.001 | Decrease |
| Antigua and Barbuda | 2021 | 0.001 | 0.750 | 0.000 | 0.001 | Decrease |
| Seychelles | 2021 | 0.001 | 0.730 | 0.000 | 0.001 | Decrease |
| Tunisia | 2021 | 0.001 | 0.682 | 0.000 | 0.001 | Decrease |
| Algeria | 2021 | 0.001 | 0.660 | 0.000 | 0.001 | Decrease |
| Iran | 2021 | 0.001 | 0.697 | 0.000 | 0.001 | Decrease |
| Palau | 2021 | 0.001 | 0.754 | 0.000 | 0.001 | Decrease |
| Taiwan (Province of China) | 2021 | 0.001 | 0.875 | 0.000 | 0.001 | Decrease |
| Turkmenistan | 2021 | 0.001 | 0.682 | 0.000 | 0.001 | Decrease |
| Slovakia | 2021 | 0.001 | 0.811 | 0.000 | 0.001 | Decrease |
| Czechia | 2021 | 0.001 | 0.828 | 0.000 | 0.001 | Decrease |
| Jordan | 2021 | 0.000 | 0.725 | 0.000 | 0.000 | Decrease |
| Barbados | 2021 | 0.000 | 0.747 | 0.000 | 0.000 | Decrease |
| Saudi Arabia | 2021 | 0.000 | 0.815 | 0.000 | 0.000 | Decrease |
| Greece | 2021 | 0.000 | 0.792 | 0.000 | 0.000 | Decrease |
| Portugal | 2021 | 0.000 | 0.744 | 0.000 | 0.000 | Decrease |
| Oman | 2021 | 0.000 | 0.773 | 0.000 | 0.000 | Decrease |
| Trinidad and Tobago | 2021 | 0.000 | 0.769 | 0.000 | 0.000 | Decrease |
| Bermuda | 2021 | 0.000 | 0.821 | 0.000 | 0.000 | Decrease |
| Bahrain | 2021 | 0.000 | 0.753 | 0.000 | 0.000 | Decrease |
| Brunei | 2021 | 0.000 | 0.810 | 0.000 | 0.000 | Decrease |
| Spain | 2021 | 0.000 | 0.769 | 0.000 | 0.000 | Decrease |
| Malta | 2021 | 0.000 | 0.802 | 0.000 | 0.000 | Decrease |
| Italy | 2021 | 0.000 | 0.806 | 0.000 | 0.000 | Decrease |
| Virgin Islands | 2021 | 0.000 | 0.822 | 0.000 | 0.000 | Decrease |
| Singapore | 2021 | 0.000 | 0.856 | 0.000 | 0.000 | Decrease |
| Japan | 2021 | 0.000 | 0.871 | 0.000 | 0.000 | Decrease |
| USA | 2021 | 0.000 | 0.862 | 0.000 | 0.000 | Decrease |
| Australia | 2021 | 0.000 | 0.844 | 0.000 | 0.000 | Decrease |
| New Zealand | 2021 | 0.000 | 0.849 | 0.000 | 0.000 | Decrease |
| South Korea | 2021 | 0.000 | 0.887 | 0.000 | 0.000 | Decrease |
| Kuwait | 2021 | 0.000 | 0.847 | 0.000 | 0.000 | Decrease |
| Israel | 2021 | 0.000 | 0.809 | 0.000 | 0.000 | Decrease |
| UK | 2021 | 0.000 | 0.859 | 0.000 | 0.000 | Decrease |
| Puerto Rico | 2021 | 0.000 | 0.826 | 0.000 | 0.000 | Decrease |
| Belgium | 2021 | 0.000 | 0.854 | 0.000 | 0.000 | Decrease |
| France | 2021 | 0.000 | 0.838 | 0.000 | 0.000 | Decrease |
| Cyprus | 2021 | 0.000 | 0.836 | 0.000 | 0.000 | Decrease |
| Canada | 2021 | 0.000 | 0.873 | 0.000 | 0.000 | Decrease |
| Greenland | 2021 | 0.000 | 0.826 | 0.000 | 0.000 | Decrease |
| Netherlands | 2021 | 0.000 | 0.888 | 0.000 | 0.000 | Decrease |
| Ireland | 2021 | 0.000 | 0.874 | 0.000 | 0.000 | Decrease |
| Finland | 2021 | 0.000 | 0.860 | 0.000 | 0.000 | Decrease |
| Iceland | 2021 | 0.000 | 0.876 | 0.000 | 0.000 | Decrease |
| Austria | 2021 | 0.000 | 0.854 | 0.000 | 0.000 | Decrease |
| Denmark | 2021 | 0.000 | 0.896 | 0.000 | 0.000 | Decrease |
| Germany | 2021 | 0.000 | 0.903 | 0.000 | 0.000 | Decrease |
| Sweden | 2021 | 0.000 | 0.887 | 0.000 | 0.000 | Decrease |
| United Arab Emirates | 2021 | 0.000 | 0.849 | 0.000 | 0.000 | Decrease |
| Monaco | 2021 | 0.000 | 0.908 | 0.000 | 0.000 | Decrease |
| Switzerland | 2021 | 0.000 | 0.933 | 0.000 | 0.000 | Decrease |
| San Marino | 2021 | 0.000 | 0.888 | 0.000 | 0.000 | Decrease |
| Luxembourg | 2021 | 0.000 | 0.884 | 0.000 | 0.000 | Decrease |
| Andorra | 2021 | 0.000 | 0.869 | 0.000 | 0.000 | Decrease |
| Norway | 2021 | 0.000 | 0.916 | 0.000 | 0.000 | Decrease |
| Qatar | 2021 | 0.000 | 0.847 | 0.000 | 0.000 | Decrease |
| Zimbabwe | 2021 | 7.493 | 0.474 | 0.020 | 7.473 | Increase |
| Egypt | 2021 | 0.002 | 0.607 | 0.002 | 0.000 | Decrease |
| LRIs, Lower Respiratory Infections; WCBA, women of Childbearing Age; ASR, Age-Standardized Rate; SDI, Socio-Demographic Index | | | | | | |

| Table D.3 Frontier analysis of DALYs in LRIs attributed to ambient particulate matter pollution among WCBA in 204 countries and territories, 2021 | | | | | | | |
| --- | --- | --- | --- | --- | --- | --- | --- |
| location | year | ASR | SDI | | frontier | effective difference | trend |
| South Africa | 2021 | 149.717 | 0.68 | 2.87 | | 146.847 | Decrease |
| Eswatini | 2021 | 128.097 | 0.585 | 2.87 | | 125.227 | Increase |
| Botswana | 2021 | 104.649 | 0.643 | 2.87 | | 101.779 | Increase |
| Equatorial Guinea | 2021 | 101.616 | 0.658 | 2.87 | | 98.746 | Increase |
| Saudi Arabia | 2021 | 94.765 | 0.815 | 0.389 | | 94.376 | Decrease |
| Namibia | 2021 | 93.208 | 0.618 | 2.87 | | 90.338 | Increase |
| Gabon | 2021 | 72.625 | 0.635 | 2.87 | | 69.754 | Decrease |
| Bangladesh | 2021 | 5.047 | 0.492 | 2.87 | | 2.177 | Decrease |
| Somalia | 2021 | 23.824 | 0.078 | 20.012 | | 3.812 | Decrease |
| Egypt | 2021 | 66.667 | 0.607 | 2.87 | | 63.796 | Decrease |
| Mozambique | 2021 | 13.381 | 0.326 | 5.568 | | 7.813 | Decrease |
| Comoros | 2021 | 11.669 | 0.476 | 2.87 | | 8.798 | Decrease |
| Lesotho | 2021 | 62.223 | 0.51 | 2.87 | | 59.353 | Increase |
| Papua New Guinea | 2021 | 12.452 | 0.418 | 3.348 | | 9.104 | Decrease |
| Peru | 2021 | 60.649 | 0.662 | 2.87 | | 57.779 | Decrease |
| Malawi | 2021 | 14.816 | 0.385 | 4.182 | | 10.633 | Decrease |
| Rwanda | 2021 | 14.128 | 0.436 | 3.047 | | 11.081 | Decrease |
| Malaysia | 2021 | 50.011 | 0.743 | 1.549 | | 48.462 | Decrease |
| Sao Tome and Principe | 2021 | 48.563 | 0.505 | 2.87 | | 45.693 | Increase |
| Cabo Verde | 2021 | 48.236 | 0.534 | 2.87 | | 45.366 | Increase |
| Ghana | 2021 | 47.321 | 0.565 | 2.87 | | 44.45 | Decrease |
| Guyana | 2021 | 46.88 | 0.651 | 2.87 | | 44.009 | Increase |
| Thailand | 2021 | 45.201 | 0.683 | 2.87 | | 42.331 | Increase |
| Libya | 2021 | 44.86 | 0.726 | 2.87 | | 41.989 | Decrease |
| Grenada | 2021 | 44.373 | 0.669 | 2.87 | | 41.503 | Decrease |
| Nepal | 2021 | 14.601 | 0.433 | 3.142 | | 11.459 | Decrease |
| Vanuatu | 2021 | 14.671 | 0.473 | 2.87 | | 11.8 | Increase |
| Haiti | 2021 | 15.249 | 0.448 | 2.953 | | 12.297 | Decrease |
| Madagascar | 2021 | 16.524 | 0.4 | 4.182 | | 12.341 | Decrease |
| Philippines | 2021 | 43.025 | 0.651 | 2.87 | | 40.155 | Decrease |
| Bolivia | 2021 | 42.681 | 0.599 | 2.87 | | 39.81 | Decrease |
| Turkmenistan | 2021 | 42.472 | 0.682 | 2.87 | | 39.602 | Decrease |
| Ethiopia | 2021 | 17.374 | 0.359 | 4.826 | | 12.548 | Decrease |
| Tanzania | 2021 | 15.895 | 0.447 | 2.953 | | 12.942 | Decrease |
| Guatemala | 2021 | 40.377 | 0.54 | 2.87 | | 37.507 | Decrease |
| Nigeria | 2021 | 39.79 | 0.503 | 2.87 | | 36.919 | Decrease |
| Uzbekistan | 2021 | 38.969 | 0.663 | 2.87 | | 36.098 | Decrease |
| Bhutan | 2021 | 17.458 | 0.473 | 2.87 | | 14.587 | Increase |
| Burundi | 2021 | 20.939 | 0.289 | 6.338 | | 14.601 | Decrease |
| Tajikistan | 2021 | 35.173 | 0.542 | 2.87 | | 32.302 | Decrease |
| Sudan | 2021 | 33.742 | 0.542 | 2.87 | | 30.872 | Increase |
| Palau | 2021 | 32.35 | 0.754 | 1.503 | | 30.847 | Increase |
| Syria | 2021 | 33.343 | 0.623 | 2.87 | | 30.473 | Decrease |
| Marshall Islands | 2021 | 33.057 | 0.574 | 2.87 | | 30.187 | Increase |
| Saint Vincent and the Grenadines | 2021 | 33.01 | 0.637 | 2.87 | | 30.139 | Increase |
| Uganda | 2021 | 19.457 | 0.423 | 3.237 | | 16.219 | Increase |
| Suriname | 2021 | 32.588 | 0.634 | 2.87 | | 29.718 | Decrease |
| Belize | 2021 | 32.079 | 0.61 | 2.87 | | 29.209 | Increase |
| Nauru | 2021 | 32.077 | 0.625 | 2.87 | | 29.207 | Decrease |
| Zambia | 2021 | 31.368 | 0.506 | 2.87 | | 28.498 | Decrease |
| Timor-Leste | 2021 | 19.557 | 0.445 | 2.953 | | 16.604 | Increase |
| Fiji | 2021 | 30.97 | 0.675 | 2.87 | | 28.1 | Increase |
| Solomon Islands | 2021 | 19.938 | 0.429 | 3.142 | | 16.796 | Increase |
| India | 2021 | 30.293 | 0.575 | 2.87 | | 27.422 | Increase |
| Tokelau | 2021 | 29.452 | 0.686 | 2.87 | | 26.581 | Decrease |
| Cambodia | 2021 | 21.328 | 0.474 | 2.87 | | 18.458 | Decrease |
| Samoa | 2021 | 28.931 | 0.593 | 2.87 | | 26.06 | Increase |
| Ukraine | 2021 | 27.225 | 0.761 | 1.503 | | 25.723 | Increase |
| The Bahamas | 2021 | 26.105 | 0.805 | 0.389 | | 25.716 | Decrease |
| Federated States of Micronesia | 2021 | 28.36 | 0.588 | 2.87 | | 25.489 | Increase |
| Argentina | 2021 | 28.35 | 0.723 | 2.87 | | 25.479 | Increase |
| Niger | 2021 | 39.334 | 0.168 | 20.012 | | 19.322 | Decrease |
| Morocco | 2021 | 28.053 | 0.563 | 2.87 | | 25.182 | Increase |
| Liberia | 2021 | 27.701 | 0.352 | 5.237 | | 22.464 | Decrease |
| Kuwait | 2021 | 25.255 | 0.847 | 0.389 | | 24.866 | Decrease |
| Iraq | 2021 | 27.012 | 0.663 | 2.87 | | 24.141 | Decrease |
| Oman | 2021 | 25.349 | 0.773 | 1.282 | | 24.067 | Decrease |
| Niue | 2021 | 25.767 | 0.726 | 1.721 | | 24.046 | Increase |
| Yemen | 2021 | 26.31 | 0.45 | 2.953 | | 23.357 | Increase |
| Algeria | 2021 | 26.661 | 0.66 | 2.87 | | 23.79 | Decrease |
| Laos | 2021 | 26.749 | 0.489 | 2.87 | | 23.879 | Decrease |
| Kazakhstan | 2021 | 26.048 | 0.725 | 2.87 | | 23.178 | Decrease |
| Lebanon | 2021 | 24.081 | 0.745 | 1.503 | | 22.579 | Decrease |
| Mongolia | 2021 | 25.44 | 0.618 | 2.87 | | 22.57 | Increase |
| Senegal | 2021 | 28.537 | 0.408 | 3.488 | | 25.049 | Decrease |
| Trinidad and Tobago | 2021 | 23.445 | 0.769 | 1.354 | | 22.091 | Decrease |
| United Arab Emirates | 2021 | 22.068 | 0.849 | 0.389 | | 21.679 | Decrease |
| Bulgaria | 2021 | 22.886 | 0.768 | 1.354 | | 21.532 | Decrease |
| Romania | 2021 | 22.735 | 0.768 | 1.354 | | 21.381 | Decrease |
| Kenya | 2021 | 23.573 | 0.524 | 2.87 | | 20.703 | Increase |
| Bahrain | 2021 | 21.957 | 0.753 | 1.503 | | 20.454 | Decrease |
| Mexico | 2021 | 22.4 | 0.665 | 2.87 | | 19.529 | Decrease |
| Iran | 2021 | 22.382 | 0.697 | 2.87 | | 19.511 | Decrease |
| Venezuela | 2021 | 22.366 | 0.597 | 2.87 | | 19.495 | Decrease |
| Benin | 2021 | 29.561 | 0.373 | 4.182 | | 25.378 | Decrease |
| Congo (Brazzaville) | 2021 | 21.936 | 0.583 | 2.87 | | 19.065 | Decrease |
| El Salvador | 2021 | 21.875 | 0.564 | 2.87 | | 19.005 | Increase |
| Seychelles | 2021 | 20.571 | 0.73 | 1.665 | | 18.906 | Decrease |
| Ecuador | 2021 | 21.652 | 0.661 | 2.87 | | 18.781 | Decrease |
| Burkina Faso | 2021 | 32.696 | 0.285 | 6.338 | | 26.358 | Decrease |
| Cuba | 2021 | 21.099 | 0.669 | 2.87 | | 18.229 | Decrease |
| Jordan | 2021 | 20.999 | 0.725 | 2.87 | | 18.128 | Decrease |
| Saint Lucia | 2021 | 20.79 | 0.673 | 2.87 | | 17.92 | Decrease |
| Palestine | 2021 | 20.726 | 0.631 | 2.87 | | 17.856 | Decrease |
| Azerbaijan | 2021 | 20.723 | 0.695 | 2.87 | | 17.853 | Decrease |
| Brazil | 2021 | 20.293 | 0.653 | 2.87 | | 17.423 | Decrease |
| Tonga | 2021 | 20.293 | 0.626 | 2.87 | | 17.422 | Increase |
| Dominica | 2021 | 18.552 | 0.747 | 1.503 | | 17.05 | Increase |
| South Sudan | 2021 | 34.641 | 0.278 | 6.718 | | 27.923 | Decrease |
| Russia | 2021 | 17.175 | 0.809 | 0.389 | | 16.786 | Decrease |
| Barbados | 2021 | 18.262 | 0.747 | 1.503 | | 16.759 | Decrease |
| Central African Republic | 2021 | 34.226 | 0.309 | 5.828 | | 28.399 | Decrease |
| Sierra Leone | 2021 | 34.696 | 0.359 | 4.826 | | 29.87 | Increase |
| Poland | 2021 | 16.535 | 0.812 | 0.389 | | 16.146 | Decrease |
| American Samoa | 2021 | 18.912 | 0.724 | 2.87 | | 16.042 | Increase |
| Moldova | 2021 | 17.672 | 0.732 | 1.665 | | 16.007 | Decrease |
| Georgia | 2021 | 16.443 | 0.79 | 0.546 | | 15.897 | Decrease |
| Tunisia | 2021 | 18.678 | 0.682 | 2.87 | | 15.807 | Decrease |
| Turkey | 2021 | 16.056 | 0.929 | 0.385 | | 15.671 | Decrease |
| Dominican Republic | 2021 | 17.962 | 0.619 | 2.87 | | 15.092 | Increase |
| Chile | 2021 | 16.078 | 0.772 | 1.282 | | 14.796 | Decrease |
| Antigua and Barbuda | 2021 | 16.206 | 0.75 | 1.503 | | 14.703 | Decrease |
| Slovakia | 2021 | 15.055 | 0.811 | 0.389 | | 14.666 | Decrease |
| Mali | 2021 | 39.854 | 0.269 | 7.438 | | 32.416 | Decrease |
| Zimbabwe | 2021 | 38.568 | 0.474 | 2.87 | | 35.698 | Increase |
| Belarus | 2021 | 14.815 | 0.784 | 0.711 | | 14.104 | Decrease |
| Northern Mariana Islands | 2021 | 15.353 | 0.772 | 1.282 | | 14.071 | Decrease |
| Armenia | 2021 | 16.262 | 0.702 | 2.87 | | 13.391 | Decrease |
| Myanmar | 2021 | 15.925 | 0.534 | 2.87 | | 13.055 | Decrease |
| Afghanistan | 2021 | 43.097 | 0.337 | 5.568 | | 37.528 | Decrease |
| Cameroon | 2021 | 42.099 | 0.48 | 2.87 | | 39.228 | Decrease |
| Chad | 2021 | 48.819 | 0.24 | 8.099 | | 40.721 | Increase |
| Guinea | 2021 | 46.388 | 0.336 | 5.568 | | 40.819 | Decrease |
| Colombia | 2021 | 14.751 | 0.655 | 2.87 | | 11.881 | Decrease |
| Cote d'Ivoire | 2021 | 44.105 | 0.426 | 3.237 | | 40.868 | Decrease |
| Togo | 2021 | 44.439 | 0.409 | 3.488 | | 40.952 | Decrease |
| Kyrgyzstan | 2021 | 14.039 | 0.604 | 2.87 | | 11.169 | Decrease |
| Pakistan | 2021 | 13.955 | 0.504 | 2.87 | | 11.084 | Increase |
| The Gambia | 2021 | 52.308 | 0.41 | 3.488 | | 48.821 | Decrease |
| Sri Lanka | 2021 | 13.891 | 0.702 | 2.87 | | 11.02 | Increase |
| Guam | 2021 | 11.402 | 0.804 | 0.389 | | 11.013 | Decrease |
| Qatar | 2021 | 11.181 | 0.847 | 0.389 | | 10.792 | Decrease |
| Eritrea | 2021 | 53.135 | 0.404 | 4.182 | | 48.952 | Decrease |
| Czechia | 2021 | 10.917 | 0.828 | 0.389 | | 10.528 | Decrease |
| Singapore | 2021 | 10.75 | 0.856 | 0.389 | | 10.361 | Decrease |
| Honduras | 2021 | 12.339 | 0.513 | 2.87 | | 9.469 | Decrease |
| Latvia | 2021 | 9.619 | 0.831 | 0.389 | | 9.23 | Decrease |
| Guinea-Bissau | 2021 | 64.046 | 0.353 | 4.826 | | 59.22 | Decrease |
| Mauritania | 2021 | 64.696 | 0.499 | 2.87 | | 61.826 | Decrease |
| Cook Islands | 2021 | 9.919 | 0.779 | 1.168 | | 8.751 | Decrease |
| Indonesia | 2021 | 10.758 | 0.657 | 2.87 | | 7.888 | Decrease |
| Kiribati | 2021 | 10.703 | 0.527 | 2.87 | | 7.833 | Increase |
| Angola | 2021 | 64.973 | 0.454 | 2.886 | | 62.088 | Increase |
| Tuvalu | 2021 | 10.506 | 0.577 | 2.87 | | 7.636 | Increase |
| Panama | 2021 | 10.101 | 0.709 | 2.87 | | 7.231 | Decrease |
| Paraguay | 2021 | 10.063 | 0.636 | 2.87 | | 7.193 | Increase |
| Mauritius | 2021 | 9.944 | 0.718 | 2.87 | | 7.073 | Decrease |
| Uruguay | 2021 | 9.902 | 0.719 | 2.87 | | 7.031 | Decrease |
| Lithuania | 2021 | 7.345 | 0.856 | 0.389 | | 6.956 | Decrease |
| Slovenia | 2021 | 7.232 | 0.842 | 0.389 | | 6.843 | Decrease |
| Jamaica | 2021 | 9.665 | 0.683 | 2.87 | | 6.795 | Increase |
| Costa Rica | 2021 | 9.481 | 0.7 | 2.87 | | 6.611 | Decrease |
| Taiwan (Province of China) | 2021 | 6.778 | 0.875 | 0.389 | | 6.389 | Decrease |
| Albania | 2021 | 8.965 | 0.707 | 2.87 | | 6.095 | Decrease |
| Croatia | 2021 | 6.394 | 0.798 | 0.434 | | 5.96 | Decrease |
| Serbia | 2021 | 6.494 | 0.792 | 0.542 | | 5.952 | Decrease |
| North Macedonia | 2021 | 6.47 | 0.751 | 1.503 | | 4.967 | Decrease |
| Hungary | 2021 | 5.401 | 0.791 | 0.546 | | 4.855 | Decrease |
| South Korea | 2021 | 5.048 | 0.887 | 0.385 | | 4.663 | Decrease |
| Montenegro | 2021 | 5.088 | 0.796 | 0.519 | | 4.569 | Decrease |
| China | 2021 | 7.228 | 0.722 | 2.87 | | 4.358 | Decrease |
| Bosnia and Herzegovina | 2021 | 7.018 | 0.723 | 2.87 | | 4.147 | Increase |
| UK | 2021 | 4.313 | 0.859 | 0.389 | | 3.924 | Decrease |
| Saint Kitts and Nevis | 2021 | 5.378 | 0.755 | 1.503 | | 3.876 | Decrease |
| Monaco | 2021 | 4.23 | 0.908 | 0.385 | | 3.845 | Decrease |
| Djibouti | 2021 | 70.427 | 0.488 | 2.87 | | 67.556 | Increase |
| Greece | 2021 | 4.163 | 0.792 | 0.542 | | 3.62 | Decrease |
| Brunei | 2021 | 3.785 | 0.81 | 0.389 | | 3.396 | Decrease |
| Malta | 2021 | 3.686 | 0.802 | 0.389 | | 3.297 | Decrease |
| Maldives | 2021 | 5.986 | 0.651 | 2.87 | | 3.115 | Decrease |
| Greenland | 2021 | 3.326 | 0.826 | 0.389 | | 2.937 | Decrease |
| Viet Nam | 2021 | 5.738 | 0.628 | 2.87 | | 2.867 | Increase |
| USA | 2021 | 3.209 | 0.862 | 0.389 | | 2.82 | Decrease |
| North Korea | 2021 | 5.574 | 0.57 | 2.87 | | 2.703 | Decrease |
| Belgium | 2021 | 3.074 | 0.854 | 0.389 | | 2.685 | Decrease |
| Estonia | 2021 | 2.913 | 0.845 | 0.389 | | 2.524 | Decrease |
| Japan | 2021 | 2.797 | 0.871 | 0.389 | | 2.409 | Decrease |
| Netherlands | 2021 | 2.587 | 0.888 | 0.385 | | 2.202 | Decrease |
| DR Congo | 2021 | 73.172 | 0.383 | 4.182 | | 68.99 | Increase |
| Israel | 2021 | 2.522 | 0.809 | 0.389 | | 2.133 | Decrease |
| Nicaragua | 2021 | 4.968 | 0.524 | 2.87 | | 2.098 | Decrease |
| Italy | 2021 | 2.164 | 0.806 | 0.389 | | 1.775 | Decrease |
| Ireland | 2021 | 2.085 | 0.874 | 0.389 | | 1.696 | Decrease |
| Virgin Islands | 2021 | 2.011 | 0.822 | 0.389 | | 1.622 | Decrease |
| Germany | 2021 | 1.99 | 0.903 | 0.385 | | 1.605 | Decrease |
| Denmark | 2021 | 1.837 | 0.896 | 0.385 | | 1.452 | Decrease |
| Bermuda | 2021 | 1.807 | 0.821 | 0.389 | | 1.418 | Decrease |
| Puerto Rico | 2021 | 1.737 | 0.826 | 0.389 | | 1.348 | Decrease |
| France | 2021 | 1.526 | 0.838 | 0.389 | | 1.137 | Decrease |
| Australia | 2021 | 1.516 | 0.844 | 0.389 | | 1.127 | Decrease |
| Cyprus | 2021 | 1.464 | 0.836 | 0.389 | | 1.075 | Decrease |
| Canada | 2021 | 1.438 | 0.873 | 0.389 | | 1.049 | Decrease |
| Portugal | 2021 | 2.183 | 0.744 | 1.503 | | 0.68 | Decrease |
| Switzerland | 2021 | 0.968 | 0.933 | 0.385 | | 0.583 | Decrease |
| Austria | 2021 | 0.971 | 0.854 | 0.389 | | 0.582 | Decrease |
| Luxembourg | 2021 | 0.906 | 0.884 | 0.389 | | 0.517 | Decrease |
| Andorra | 2021 | 0.844 | 0.869 | 0.389 | | 0.455 | Decrease |
| Iceland | 2021 | 0.83 | 0.876 | 0.389 | | 0.441 | Decrease |
| San Marino | 2021 | 0.681 | 0.888 | 0.385 | | 0.296 | Decrease |
| New Zealand | 2021 | 0.649 | 0.849 | 0.389 | | 0.26 | Decrease |
| Finland | 2021 | 0.584 | 0.86 | 0.389 | | 0.195 | Decrease |
| Spain | 2021 | 1.453 | 0.769 | 1.354 | | 0.099 | Decrease |
| Norway | 2021 | 0.435 | 0.916 | 0.385 | | 0.05 | Decrease |
| Sweden | 2021 | 0.422 | 0.887 | 0.385 | | 0.037 | Decrease |
| LRIs, Lower Respiratory Infections; WCBA, women of Childbearing Age; ASR, Age-Standardized Rate; SDI, Socio-Demographic Index | | | | | | | |

| Table D.4 Frontier analysis of DALYs in LRIs attributed to household air pollution from solid fuels among WCBA in 204 countries and territories, 2021 | | | | | | | |
| --- | --- | --- | --- | --- | --- | --- | --- |
| location | year | ASR | SDI | | frontier | effective difference | trend |
| Lesotho | 2021 | 404.853 | 0.510 | 0.433 | | 404.420 | Increase |
| Niger | 2021 | 226.691 | 0.168 | 226.691 | | 0.000 | Decrease |
| Somalia | 2021 | 419.930 | 0.078 | 419.102 | | 0.828 | Decrease |
| Bhutan | 2021 | 6.578 | 0.473 | 1.125 | | 5.452 | Decrease |
| Bangladesh | 2021 | 28.174 | 0.492 | 0.956 | | 27.218 | Decrease |
| Yemen | 2021 | 33.276 | 0.450 | 1.278 | | 31.998 | Decrease |
| Nepal | 2021 | 47.707 | 0.433 | 1.644 | | 46.063 | Decrease |
| Congo (Brazzaville) | 2021 | 292.936 | 0.583 | 0.149 | | 292.787 | Decrease |
| Djibouti | 2021 | 54.338 | 0.488 | 0.956 | | 53.383 | Decrease |
| Timor-Leste | 2021 | 73.512 | 0.445 | 1.278 | | 72.234 | Decrease |
| Angola | 2021 | 75.327 | 0.454 | 1.278 | | 74.049 | Decrease |
| Mauritania | 2021 | 83.599 | 0.499 | 0.887 | | 82.712 | Decrease |
| Laos | 2021 | 90.771 | 0.489 | 0.956 | | 89.815 | Decrease |
| Papua New Guinea | 2021 | 119.483 | 0.418 | 8.029 | | 111.455 | Decrease |
| DR Congo | 2021 | 140.858 | 0.383 | 28.448 | | 112.410 | Decrease |
| Mali | 2021 | 192.627 | 0.269 | 71.002 | | 121.625 | Decrease |
| Benin | 2021 | 161.295 | 0.373 | 31.731 | | 129.564 | Decrease |
| Burkina Faso | 2021 | 192.555 | 0.285 | 61.625 | | 130.930 | Decrease |
| Cote d'Ivoire | 2021 | 140.970 | 0.426 | 8.029 | | 132.941 | Decrease |
| Cambodia | 2021 | 135.897 | 0.474 | 1.125 | | 134.772 | Decrease |
| Ethiopia | 2021 | 179.280 | 0.359 | 35.060 | | 144.220 | Decrease |
| Senegal | 2021 | 163.129 | 0.408 | 15.499 | | 147.631 | Decrease |
| Cameroon | 2021 | 161.425 | 0.480 | 0.956 | | 160.469 | Decrease |
| Zambia | 2021 | 189.549 | 0.506 | 0.481 | | 189.068 | Decrease |
| Sao Tome and Principe | 2021 | 175.184 | 0.505 | 0.481 | | 174.703 | Decrease |
| Uganda | 2021 | 168.719 | 0.423 | 8.029 | | 160.690 | Decrease |
| Tanzania | 2021 | 167.844 | 0.447 | 1.278 | | 166.566 | Decrease |
| Haiti | 2021 | 190.472 | 0.448 | 1.278 | | 189.194 | Decrease |
| Eswatini | 2021 | 158.607 | 0.585 | 0.149 | | 158.458 | Decrease |
| Kenya | 2021 | 157.416 | 0.524 | 0.352 | | 157.064 | Decrease |
| Marshall Islands | 2021 | 153.574 | 0.574 | 0.171 | | 153.404 | Decrease |
| Kiribati | 2021 | 148.432 | 0.527 | 0.352 | | 148.080 | Decrease |
| Chad | 2021 | 263.200 | 0.240 | 73.511 | | 189.689 | Decrease |
| Mozambique | 2021 | 229.758 | 0.326 | 39.092 | | 190.666 | Decrease |
| Samoa | 2021 | 141.253 | 0.593 | 0.138 | | 141.115 | Decrease |
| Liberia | 2021 | 240.270 | 0.352 | 38.889 | | 201.382 | Decrease |
| Rwanda | 2021 | 206.652 | 0.436 | 1.644 | | 205.008 | Decrease |
| Vanuatu | 2021 | 210.352 | 0.473 | 1.125 | | 209.226 | Decrease |
| Malawi | 2021 | 240.828 | 0.385 | 28.448 | | 212.380 | Decrease |
| Federated States of Micronesia | 2021 | 125.293 | 0.588 | 0.149 | | 125.144 | Decrease |
| South Sudan | 2021 | 283.005 | 0.278 | 65.785 | | 217.220 | Increase |
| Comoros | 2021 | 226.321 | 0.476 | 0.956 | | 225.365 | Decrease |
| Togo | 2021 | 252.453 | 0.409 | 15.499 | | 236.954 | Decrease |
| Ghana | 2021 | 93.288 | 0.565 | 0.219 | | 93.069 | Decrease |
| Sierra Leone | 2021 | 280.466 | 0.359 | 35.060 | | 245.406 | Increase |
| The Gambia | 2021 | 264.477 | 0.410 | 15.499 | | 248.979 | Decrease |
| Namibia | 2021 | 78.323 | 0.618 | 0.111 | | 78.212 | Decrease |
| Guinea | 2021 | 290.254 | 0.336 | 39.092 | | 251.162 | Decrease |
| Nigeria | 2021 | 73.889 | 0.503 | 0.887 | | 73.001 | Decrease |
| Guatemala | 2021 | 72.773 | 0.540 | 0.307 | | 72.466 | Decrease |
| Afghanistan | 2021 | 290.530 | 0.337 | 39.092 | | 251.438 | Decrease |
| Tajikistan | 2021 | 66.735 | 0.542 | 0.307 | | 66.429 | Decrease |
| Philippines | 2021 | 63.763 | 0.651 | 0.002 | | 63.762 | Decrease |
| Tonga | 2021 | 59.849 | 0.626 | 0.093 | | 59.757 | Decrease |
| Tuvalu | 2021 | 54.542 | 0.577 | 0.171 | | 54.371 | Decrease |
| Burundi | 2021 | 331.629 | 0.289 | 61.625 | | 270.004 | Decrease |
| India | 2021 | 48.597 | 0.575 | 0.171 | | 48.426 | Decrease |
| North Korea | 2021 | 47.965 | 0.570 | 0.171 | | 47.795 | Decrease |
| Eritrea | 2021 | 329.904 | 0.404 | 17.064 | | 312.840 | Decrease |
| Honduras | 2021 | 46.080 | 0.513 | 0.433 | | 45.647 | Decrease |
| South Africa | 2021 | 42.684 | 0.680 | 0.001 | | 42.682 | Decrease |
| Myanmar | 2021 | 41.924 | 0.534 | 0.307 | | 41.618 | Decrease |
| Sudan | 2021 | 40.336 | 0.542 | 0.307 | | 40.029 | Decrease |
| Guinea-Bissau | 2021 | 386.408 | 0.353 | 38.889 | | 347.520 | Decrease |
| Fiji | 2021 | 28.180 | 0.675 | 0.001 | | 28.179 | Decrease |
| Central African Republic | 2021 | 416.866 | 0.309 | 55.109 | | 361.757 | Decrease |
| Botswana | 2021 | 27.134 | 0.643 | 0.070 | | 27.064 | Decrease |
| Bolivia | 2021 | 26.723 | 0.599 | 0.138 | | 26.585 | Decrease |
| Kyrgyzstan | 2021 | 23.795 | 0.604 | 0.137 | | 23.658 | Decrease |
| Pakistan | 2021 | 23.475 | 0.504 | 0.887 | | 22.588 | Decrease |
| Cabo Verde | 2021 | 20.426 | 0.534 | 0.307 | | 20.119 | Decrease |
| Nicaragua | 2021 | 18.297 | 0.524 | 0.352 | | 17.944 | Decrease |
| Moldova | 2021 | 13.538 | 0.732 | 0.000 | | 13.538 | Decrease |
| Sri Lanka | 2021 | 11.281 | 0.702 | 0.001 | | 11.281 | Decrease |
| Mongolia | 2021 | 10.944 | 0.618 | 0.111 | | 10.833 | Decrease |
| El Salvador | 2021 | 10.797 | 0.564 | 0.219 | | 10.579 | Decrease |
| Paraguay | 2021 | 10.521 | 0.636 | 0.080 | | 10.441 | Decrease |
| Peru | 2021 | 10.264 | 0.662 | 0.001 | | 10.263 | Decrease |
| Belize | 2021 | 9.689 | 0.610 | 0.123 | | 9.566 | Decrease |
| Viet Nam | 2021 | 9.478 | 0.628 | 0.093 | | 9.385 | Decrease |
| Indonesia | 2021 | 9.151 | 0.657 | 0.002 | | 9.150 | Decrease |
| Nauru | 2021 | 8.989 | 0.625 | 0.093 | | 8.897 | Decrease |
| Uzbekistan | 2021 | 8.770 | 0.663 | 0.001 | | 8.768 | Decrease |
| Guyana | 2021 | 7.816 | 0.651 | 0.002 | | 7.814 | Decrease |
| Georgia | 2021 | 6.979 | 0.790 | 0.000 | | 6.978 | Decrease |
| Niue | 2021 | 5.854 | 0.726 | 0.000 | | 5.854 | Decrease |
| American Samoa | 2021 | 5.771 | 0.724 | 0.000 | | 5.771 | Increase |
| Solomon Islands | 2021 | 369.925 | 0.429 | 1.644 | | 368.281 | Decrease |
| Gabon | 2021 | 4.465 | 0.635 | 0.080 | | 4.385 | Decrease |
| Brazil | 2021 | 4.309 | 0.653 | 0.002 | | 4.307 | Decrease |
| Mexico | 2021 | 3.672 | 0.665 | 0.001 | | 3.671 | Decrease |
| Albania | 2021 | 3.629 | 0.707 | 0.001 | | 3.628 | Decrease |
| Thailand | 2021 | 3.531 | 0.683 | 0.001 | | 3.529 | Decrease |
| Equatorial Guinea | 2021 | 3.321 | 0.658 | 0.002 | | 3.320 | Decrease |
| Jamaica | 2021 | 3.300 | 0.683 | 0.001 | | 3.298 | Decrease |
| Ukraine | 2021 | 2.939 | 0.761 | 0.000 | | 2.939 | Increase |
| Bosnia and Herzegovina | 2021 | 2.711 | 0.723 | 0.000 | | 2.711 | Decrease |
| Dominica | 2021 | 2.647 | 0.747 | 0.000 | | 2.647 | Decrease |
| Ecuador | 2021 | 2.472 | 0.661 | 0.001 | | 2.471 | Decrease |
| China | 2021 | 2.315 | 0.722 | 0.000 | | 2.315 | Decrease |
| Morocco | 2021 | 2.315 | 0.563 | 0.219 | | 2.096 | Decrease |
| Colombia | 2021 | 1.964 | 0.655 | 0.002 | | 1.963 | Decrease |
| Bulgaria | 2021 | 1.952 | 0.768 | 0.000 | | 1.952 | Decrease |
| Suriname | 2021 | 1.873 | 0.634 | 0.080 | | 1.793 | Decrease |
| Saint Vincent and the Grenadines | 2021 | 1.633 | 0.637 | 0.080 | | 1.553 | Decrease |
| Palestine | 2021 | 1.521 | 0.631 | 0.080 | | 1.440 | Decrease |
| Dominican Republic | 2021 | 1.383 | 0.619 | 0.111 | | 1.273 | Decrease |
| Romania | 2021 | 1.266 | 0.768 | 0.000 | | 1.266 | Decrease |
| Montenegro | 2021 | 1.146 | 0.796 | 0.000 | | 1.146 | Decrease |
| Serbia | 2021 | 1.062 | 0.792 | 0.000 | | 1.062 | Decrease |
| North Macedonia | 2021 | 1.017 | 0.751 | 0.000 | | 1.017 | Decrease |
| Cuba | 2021 | 1.017 | 0.669 | 0.001 | | 1.015 | Decrease |
| Azerbaijan | 2021 | 0.999 | 0.695 | 0.001 | | 0.997 | Decrease |
| Saint Lucia | 2021 | 0.968 | 0.673 | 0.001 | | 0.966 | Decrease |
| Grenada | 2021 | 0.906 | 0.669 | 0.001 | | 0.904 | Decrease |
| Armenia | 2021 | 0.839 | 0.702 | 0.001 | | 0.838 | Decrease |
| Madagascar | 2021 | 414.322 | 0.400 | 22.843 | | 391.480 | Decrease |
| Costa Rica | 2021 | 0.774 | 0.700 | 0.001 | | 0.773 | Decrease |
| Maldives | 2021 | 0.744 | 0.651 | 0.002 | | 0.742 | Decrease |
| Chile | 2021 | 0.726 | 0.772 | 0.000 | | 0.726 | Decrease |
| Argentina | 2021 | 0.596 | 0.723 | 0.000 | | 0.596 | Decrease |
| Poland | 2021 | 0.580 | 0.812 | 0.000 | | 0.580 | Decrease |
| Panama | 2021 | 0.556 | 0.709 | 0.001 | | 0.555 | Decrease |
| Latvia | 2021 | 0.548 | 0.831 | 0.000 | | 0.548 | Decrease |
| Kazakhstan | 2021 | 0.546 | 0.725 | 0.000 | | 0.546 | Decrease |
| Northern Mariana Islands | 2021 | 0.489 | 0.772 | 0.000 | | 0.489 | Decrease |
| Cook Islands | 2021 | 0.451 | 0.779 | 0.000 | | 0.451 | Decrease |
| Russia | 2021 | 0.320 | 0.809 | 0.000 | | 0.320 | Decrease |
| Hungary | 2021 | 0.287 | 0.791 | 0.000 | | 0.287 | Decrease |
| Venezuela | 2021 | 0.408 | 0.597 | 0.138 | | 0.270 | Decrease |
| Uruguay | 2021 | 0.236 | 0.719 | 0.000 | | 0.236 | Decrease |
| Tokelau | 2021 | 0.189 | 0.686 | 0.001 | | 0.188 | Decrease |
| Estonia | 2021 | 0.181 | 0.845 | 0.000 | | 0.181 | Decrease |
| Iraq | 2021 | 0.173 | 0.663 | 0.001 | | 0.171 | Decrease |
| Libya | 2021 | 0.168 | 0.726 | 0.000 | | 0.167 | Decrease |
| Malaysia | 2021 | 0.156 | 0.743 | 0.000 | | 0.156 | Decrease |
| Croatia | 2021 | 0.139 | 0.798 | 0.000 | | 0.139 | Decrease |
| Mauritius | 2021 | 0.138 | 0.718 | 0.000 | | 0.138 | Decrease |
| Slovenia | 2021 | 0.126 | 0.842 | 0.000 | | 0.126 | Decrease |
| Lebanon | 2021 | 0.116 | 0.745 | 0.000 | | 0.116 | Decrease |
| Belarus | 2021 | 0.101 | 0.784 | 0.000 | | 0.101 | Decrease |
| Lithuania | 2021 | 0.099 | 0.856 | 0.000 | | 0.099 | Decrease |
| Turkey | 2021 | 0.091 | 0.929 | 0.000 | | 0.091 | Decrease |
| Guam | 2021 | 0.090 | 0.804 | 0.000 | | 0.090 | Decrease |
| Syria | 2021 | 0.186 | 0.623 | 0.103 | | 0.083 | Decrease |
| The Bahamas | 2021 | 0.083 | 0.805 | 0.000 | | 0.083 | Decrease |
| Saint Kitts and Nevis | 2021 | 0.075 | 0.755 | 0.000 | | 0.075 | Decrease |
| Antigua and Barbuda | 2021 | 0.074 | 0.750 | 0.000 | | 0.074 | Decrease |
| Seychelles | 2021 | 0.071 | 0.730 | 0.000 | | 0.071 | Decrease |
| Tunisia | 2021 | 0.072 | 0.682 | 0.001 | | 0.071 | Decrease |
| Iran | 2021 | 0.062 | 0.697 | 0.001 | | 0.061 | Decrease |
| Palau | 2021 | 0.058 | 0.754 | 0.000 | | 0.058 | Decrease |
| Algeria | 2021 | 0.058 | 0.660 | 0.002 | | 0.056 | Decrease |
| Taiwan (Province of China) | 2021 | 0.048 | 0.875 | 0.000 | | 0.048 | Decrease |
| Turkmenistan | 2021 | 0.043 | 0.682 | 0.001 | | 0.041 | Decrease |
| Slovakia | 2021 | 0.036 | 0.811 | 0.000 | | 0.036 | Decrease |
| Czechia | 2021 | 0.029 | 0.828 | 0.000 | | 0.029 | Decrease |
| Jordan | 2021 | 0.017 | 0.725 | 0.000 | | 0.017 | Decrease |
| Barbados | 2021 | 0.015 | 0.747 | 0.000 | | 0.015 | Decrease |
| Saudi Arabia | 2021 | 0.009 | 0.815 | 0.000 | | 0.009 | Decrease |
| Greece | 2021 | 0.009 | 0.792 | 0.000 | | 0.009 | Decrease |
| Portugal | 2021 | 0.008 | 0.744 | 0.000 | | 0.008 | Decrease |
| Oman | 2021 | 0.007 | 0.773 | 0.000 | | 0.006 | Decrease |
| Trinidad and Tobago | 2021 | 0.005 | 0.769 | 0.000 | | 0.005 | Decrease |
| Bermuda | 2021 | 0.004 | 0.821 | 0.000 | | 0.004 | Decrease |
| Bahrain | 2021 | 0.004 | 0.753 | 0.000 | | 0.004 | Decrease |
| Brunei | 2021 | 0.003 | 0.810 | 0.000 | | 0.003 | Decrease |
| Spain | 2021 | 0.003 | 0.769 | 0.000 | | 0.003 | Decrease |
| Malta | 2021 | 0.003 | 0.802 | 0.000 | | 0.003 | Decrease |
| Italy | 2021 | 0.003 | 0.806 | 0.000 | | 0.002 | Decrease |
| Singapore | 2021 | 0.002 | 0.856 | 0.000 | | 0.002 | Decrease |
| Virgin Islands | 2021 | 0.002 | 0.822 | 0.000 | | 0.002 | Decrease |
| Japan | 2021 | 0.002 | 0.871 | 0.000 | | 0.002 | Decrease |
| USA | 2021 | 0.001 | 0.862 | 0.000 | | 0.001 | Decrease |
| New Zealand | 2021 | 0.001 | 0.849 | 0.000 | | 0.001 | Decrease |
| Australia | 2021 | 0.001 | 0.844 | 0.000 | | 0.001 | Decrease |
| South Korea | 2021 | 0.001 | 0.887 | 0.000 | | 0.001 | Decrease |
| Kuwait | 2021 | 0.001 | 0.847 | 0.000 | | 0.001 | Decrease |
| Israel | 2021 | 0.001 | 0.809 | 0.000 | | 0.001 | Decrease |
| Puerto Rico | 2021 | 0.001 | 0.826 | 0.000 | | 0.001 | Decrease |
| UK | 2021 | 0.001 | 0.859 | 0.000 | | 0.001 | Decrease |
| Belgium | 2021 | 0.001 | 0.854 | 0.000 | | 0.001 | Decrease |
| France | 2021 | 0.001 | 0.838 | 0.000 | | 0.001 | Decrease |
| Cyprus | 2021 | 0.001 | 0.836 | 0.000 | | 0.000 | Decrease |
| Canada | 2021 | 0.000 | 0.873 | 0.000 | | 0.000 | Decrease |
| Greenland | 2021 | 0.000 | 0.826 | 0.000 | | 0.000 | Decrease |
| Netherlands | 2021 | 0.000 | 0.888 | 0.000 | | 0.000 | Decrease |
| Ireland | 2021 | 0.000 | 0.874 | 0.000 | | 0.000 | Decrease |
| Finland | 2021 | 0.000 | 0.860 | 0.000 | | 0.000 | Decrease |
| Iceland | 2021 | 0.000 | 0.876 | 0.000 | | 0.000 | Decrease |
| Austria | 2021 | 0.000 | 0.854 | 0.000 | | 0.000 | Decrease |
| Denmark | 2021 | 0.000 | 0.896 | 0.000 | | 0.000 | Decrease |
| Germany | 2021 | 0.000 | 0.903 | 0.000 | | 0.000 | Decrease |
| Sweden | 2021 | 0.000 | 0.887 | 0.000 | | 0.000 | Decrease |
| United Arab Emirates | 2021 | 0.000 | 0.849 | 0.000 | | 0.000 | Decrease |
| Monaco | 2021 | 0.000 | 0.908 | 0.000 | | 0.000 | Decrease |
| San Marino | 2021 | 0.000 | 0.888 | 0.000 | | 0.000 | Decrease |
| Switzerland | 2021 | 0.000 | 0.933 | 0.000 | | 0.000 | Decrease |
| Luxembourg | 2021 | 0.000 | 0.884 | 0.000 | | 0.000 | Decrease |
| Andorra | 2021 | 0.000 | 0.869 | 0.000 | | 0.000 | Decrease |
| Norway | 2021 | 0.000 | 0.916 | 0.000 | | 0.000 | Decrease |
| Qatar | 2021 | 0.000 | 0.847 | 0.000 | | 0.000 | Decrease |
| Zimbabwe | 2021 | 401.806 | 0.474 | 1.125 | | 400.681 | Increase |
| Egypt | 2021 | 0.123 | 0.607 | 0.123 | | 0.000 | Decrease |
| LRIs, Lower Respiratory Infections; WCBA, women of Childbearing Age; ASR, Age-Standardized Rate; SDI, Socio-Demographic Index | | | | | | | |

**
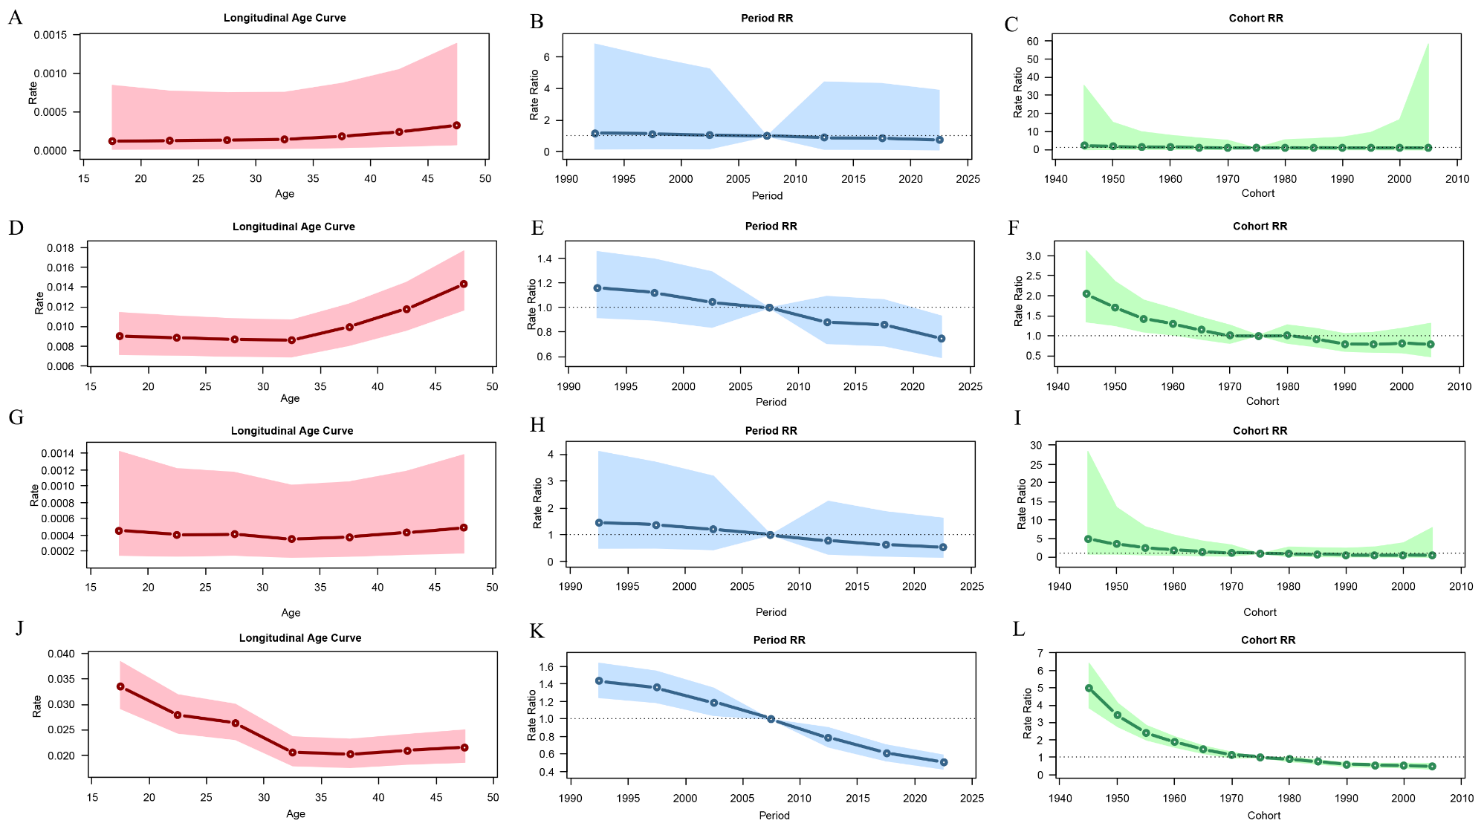
**

Fig. S1 APC Analysis of air pollution associated LRIs Burden Dynamics in WCBA. (A, D, G, J) Age effects: Longitudinal age-specific rates adjusted for birth cohort and period variations. (B, E, H, K) Period effects: RR of LRIs outcomes (mortality and DALYs) across 5-year periods (1990 - 1995 to 2020 - 2025), referenced to the 2005 - 2010 baseline. (C, F, I, L) Cohort effects: RR by birth cohort (1945 - 2005), referenced to the 1975 birth cohort. (A - C) The effect of APC on deaths from LRIs associated with ambient particulate matter pollution. (D - F) The effect of APC on deaths from LRIs associated with household solid fuel air pollution. (G - I) The effect of APC on DALYs of LRIs associated with ambient particulate matter pollution. (J - L) The effect of APC on DALYs of LRIs associated with household solid fuel air pollution. APC, age-period-cohort; LRIs, lower respiratory infections; WCBA, women of childbearing age; RR, relative risk; DALYs, disability-adjusted life years.

**
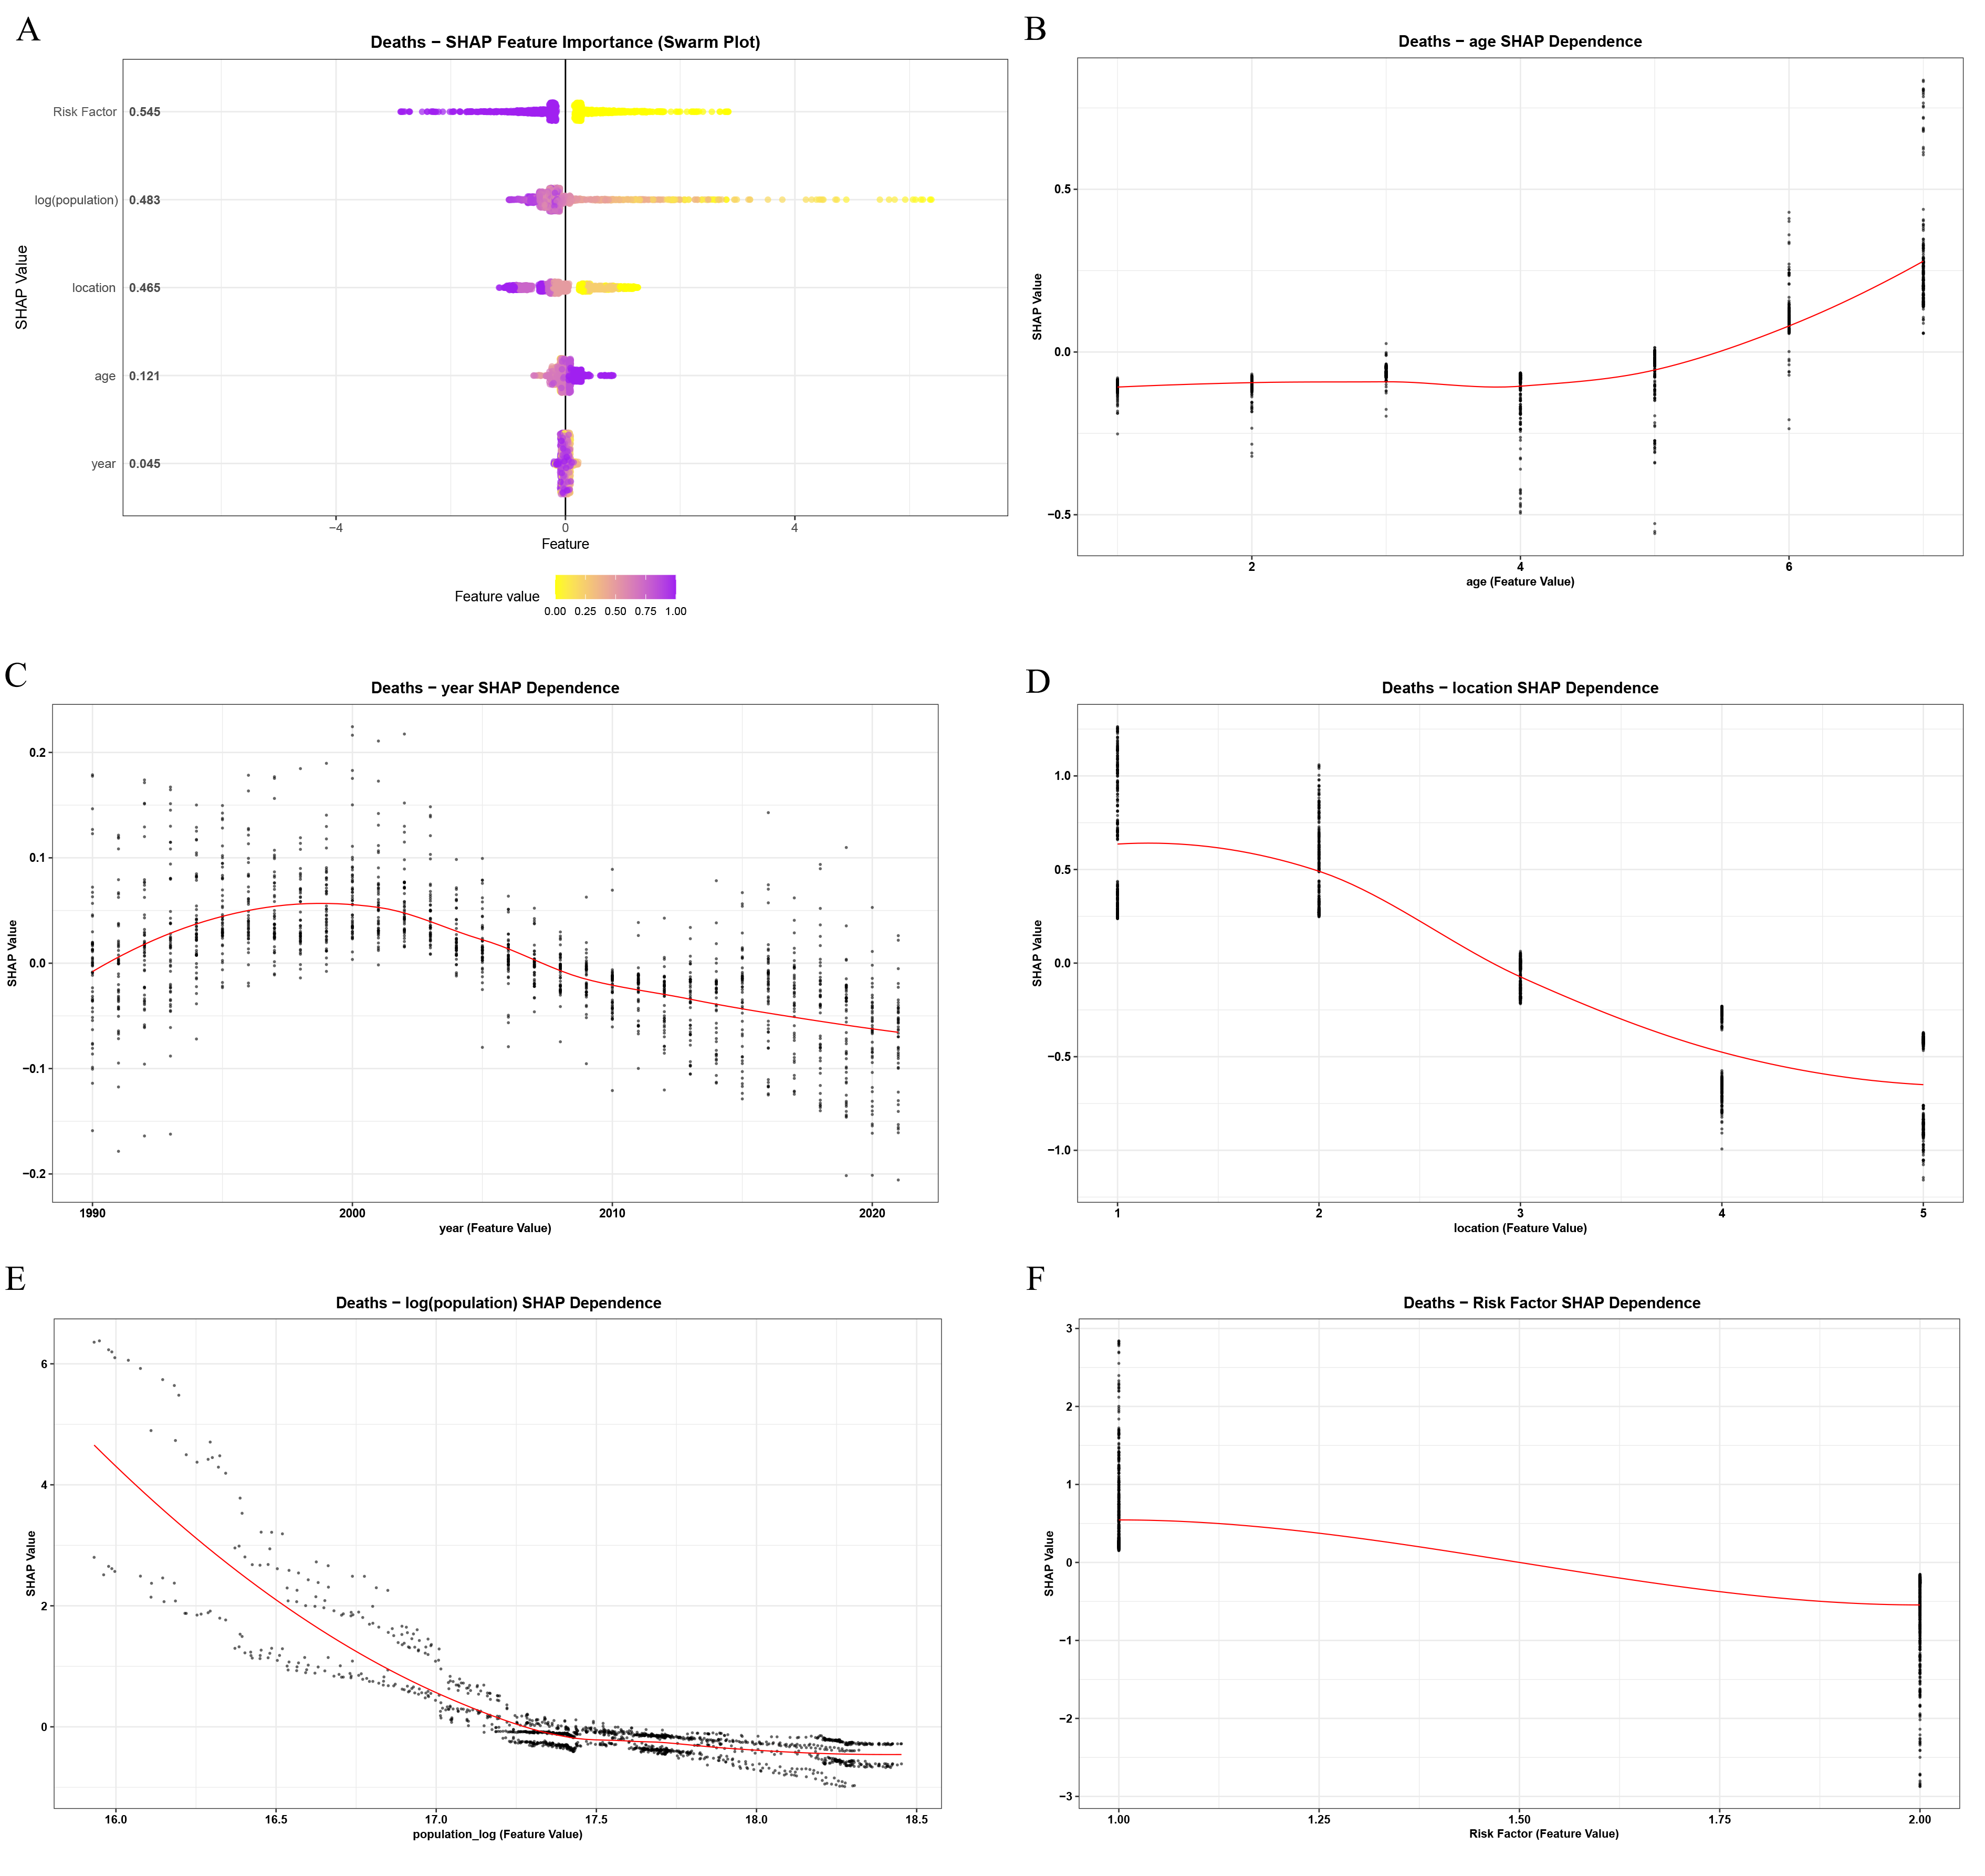
**

Fig. S2 SHAP-Aided XGBoost Model Interpretation for LRIs Mortality Among WCBA Across 5 SDI. SHAP summary plots exhibit the impacts of five features-age, year, risk factor, location, and population logarithm-on LRIs mortality across each SDI. (A) Summary plot. (B-F) Dependence plots illustrating the contribution of age (B), year (C), location (D), log(population) (E), and risk factor (F). Each dot maps to a single observation in the dataset; color saturation denotes the original feature value (pink = high value, yellow = low value). The x-axis denotes SHAP values, which reflect the magnitude and direction of the feature’s influence on the XGBoost model output; the y-axis lists the relevant features. LRIs, lower respiratory infections; WCBA, women of childbearing age; XGBoost,eXtreme Gradient Boosting; SHAP, Shapley additive explanations.


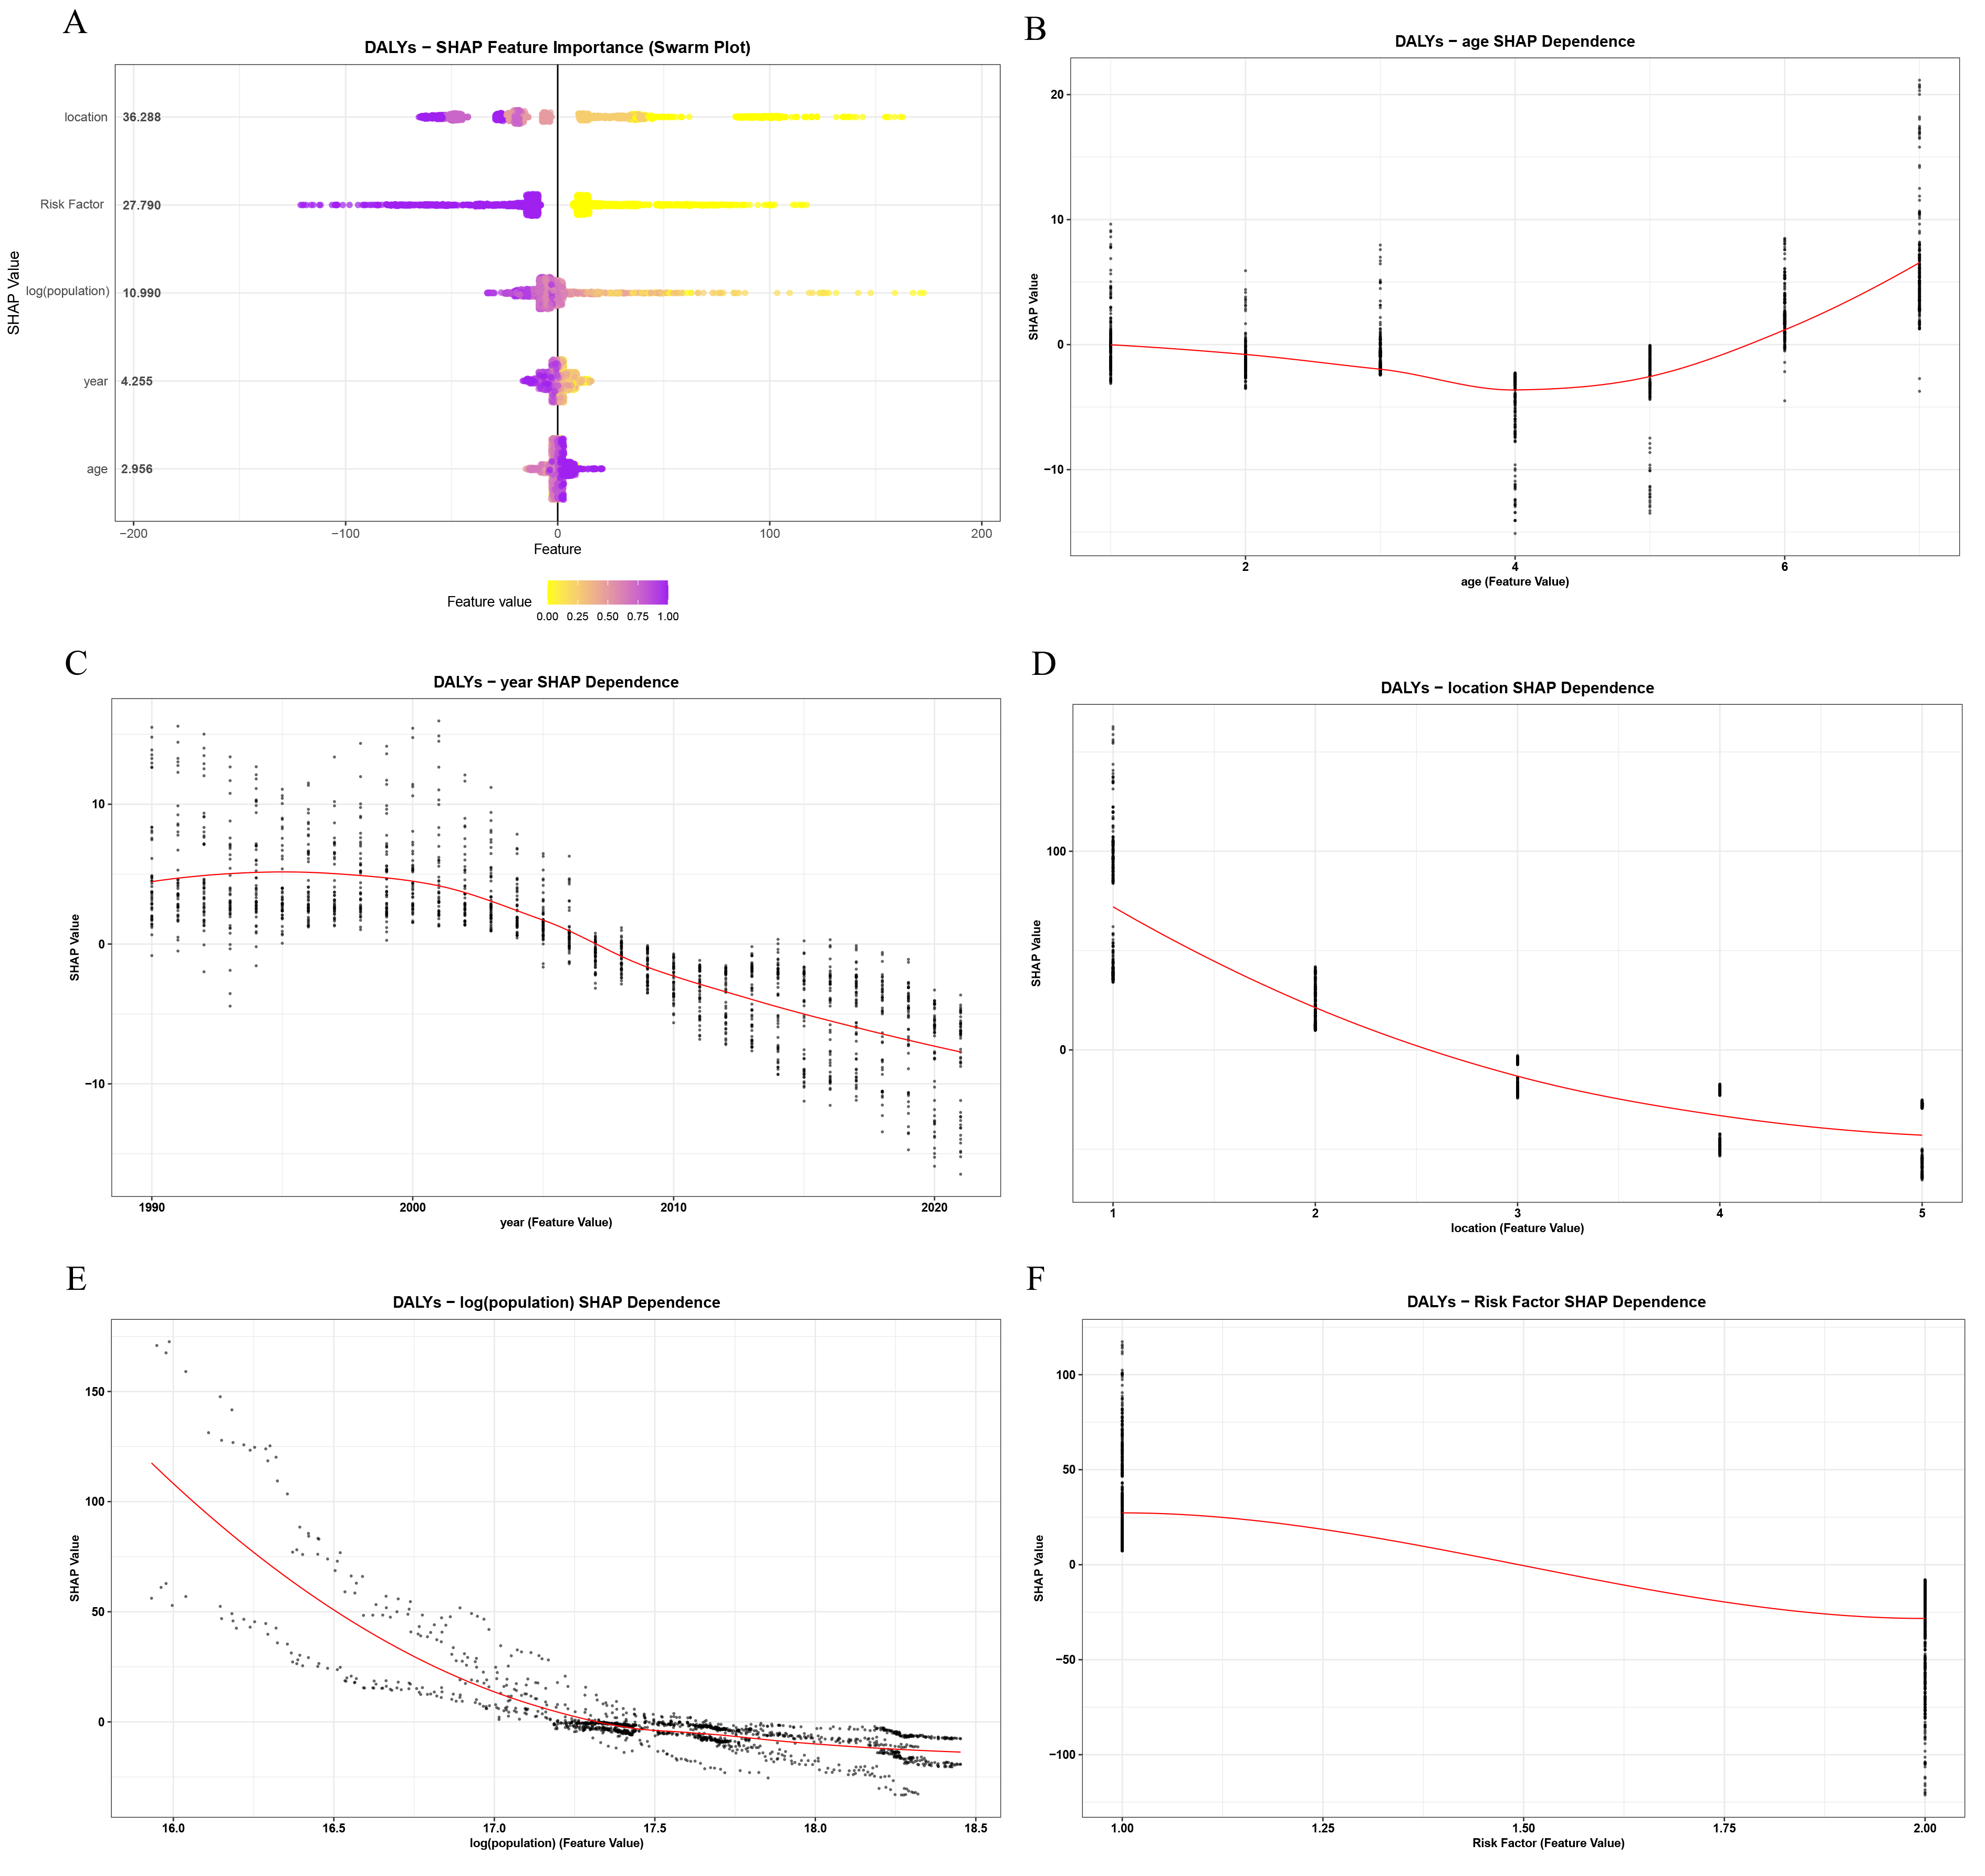


Fig. S3 XGBoost Model Interpretation via SHAP for LRIs DALYs Among WCBA Across 5 SDI. SHAP summary plots depict the effects of five features-age, year, risk factor, location, and population logarithm-on LRIs mortality across each SDI. (A) Summary plot. (B-F) The dependence plot showing the contribution of age (B), year (C), location (D), log (population) (E), and risk factor (F). Each dot represents an individual observation in the dataset; color intensity indicates the original feature value (pink = high value, yellow = low value). The x-axis denotes SHAP values, which reflect the magnitude and direction of the feature’s impact on the XGBoost model output; the y-axis lists the respective features. LRIs, lower respiratory infections; WCBA, women of childbearing age; DALYs, disability-adjusted life years; XGBoost,eXtreme Gradient Boosting; SHAP, Shapley additive explanations.


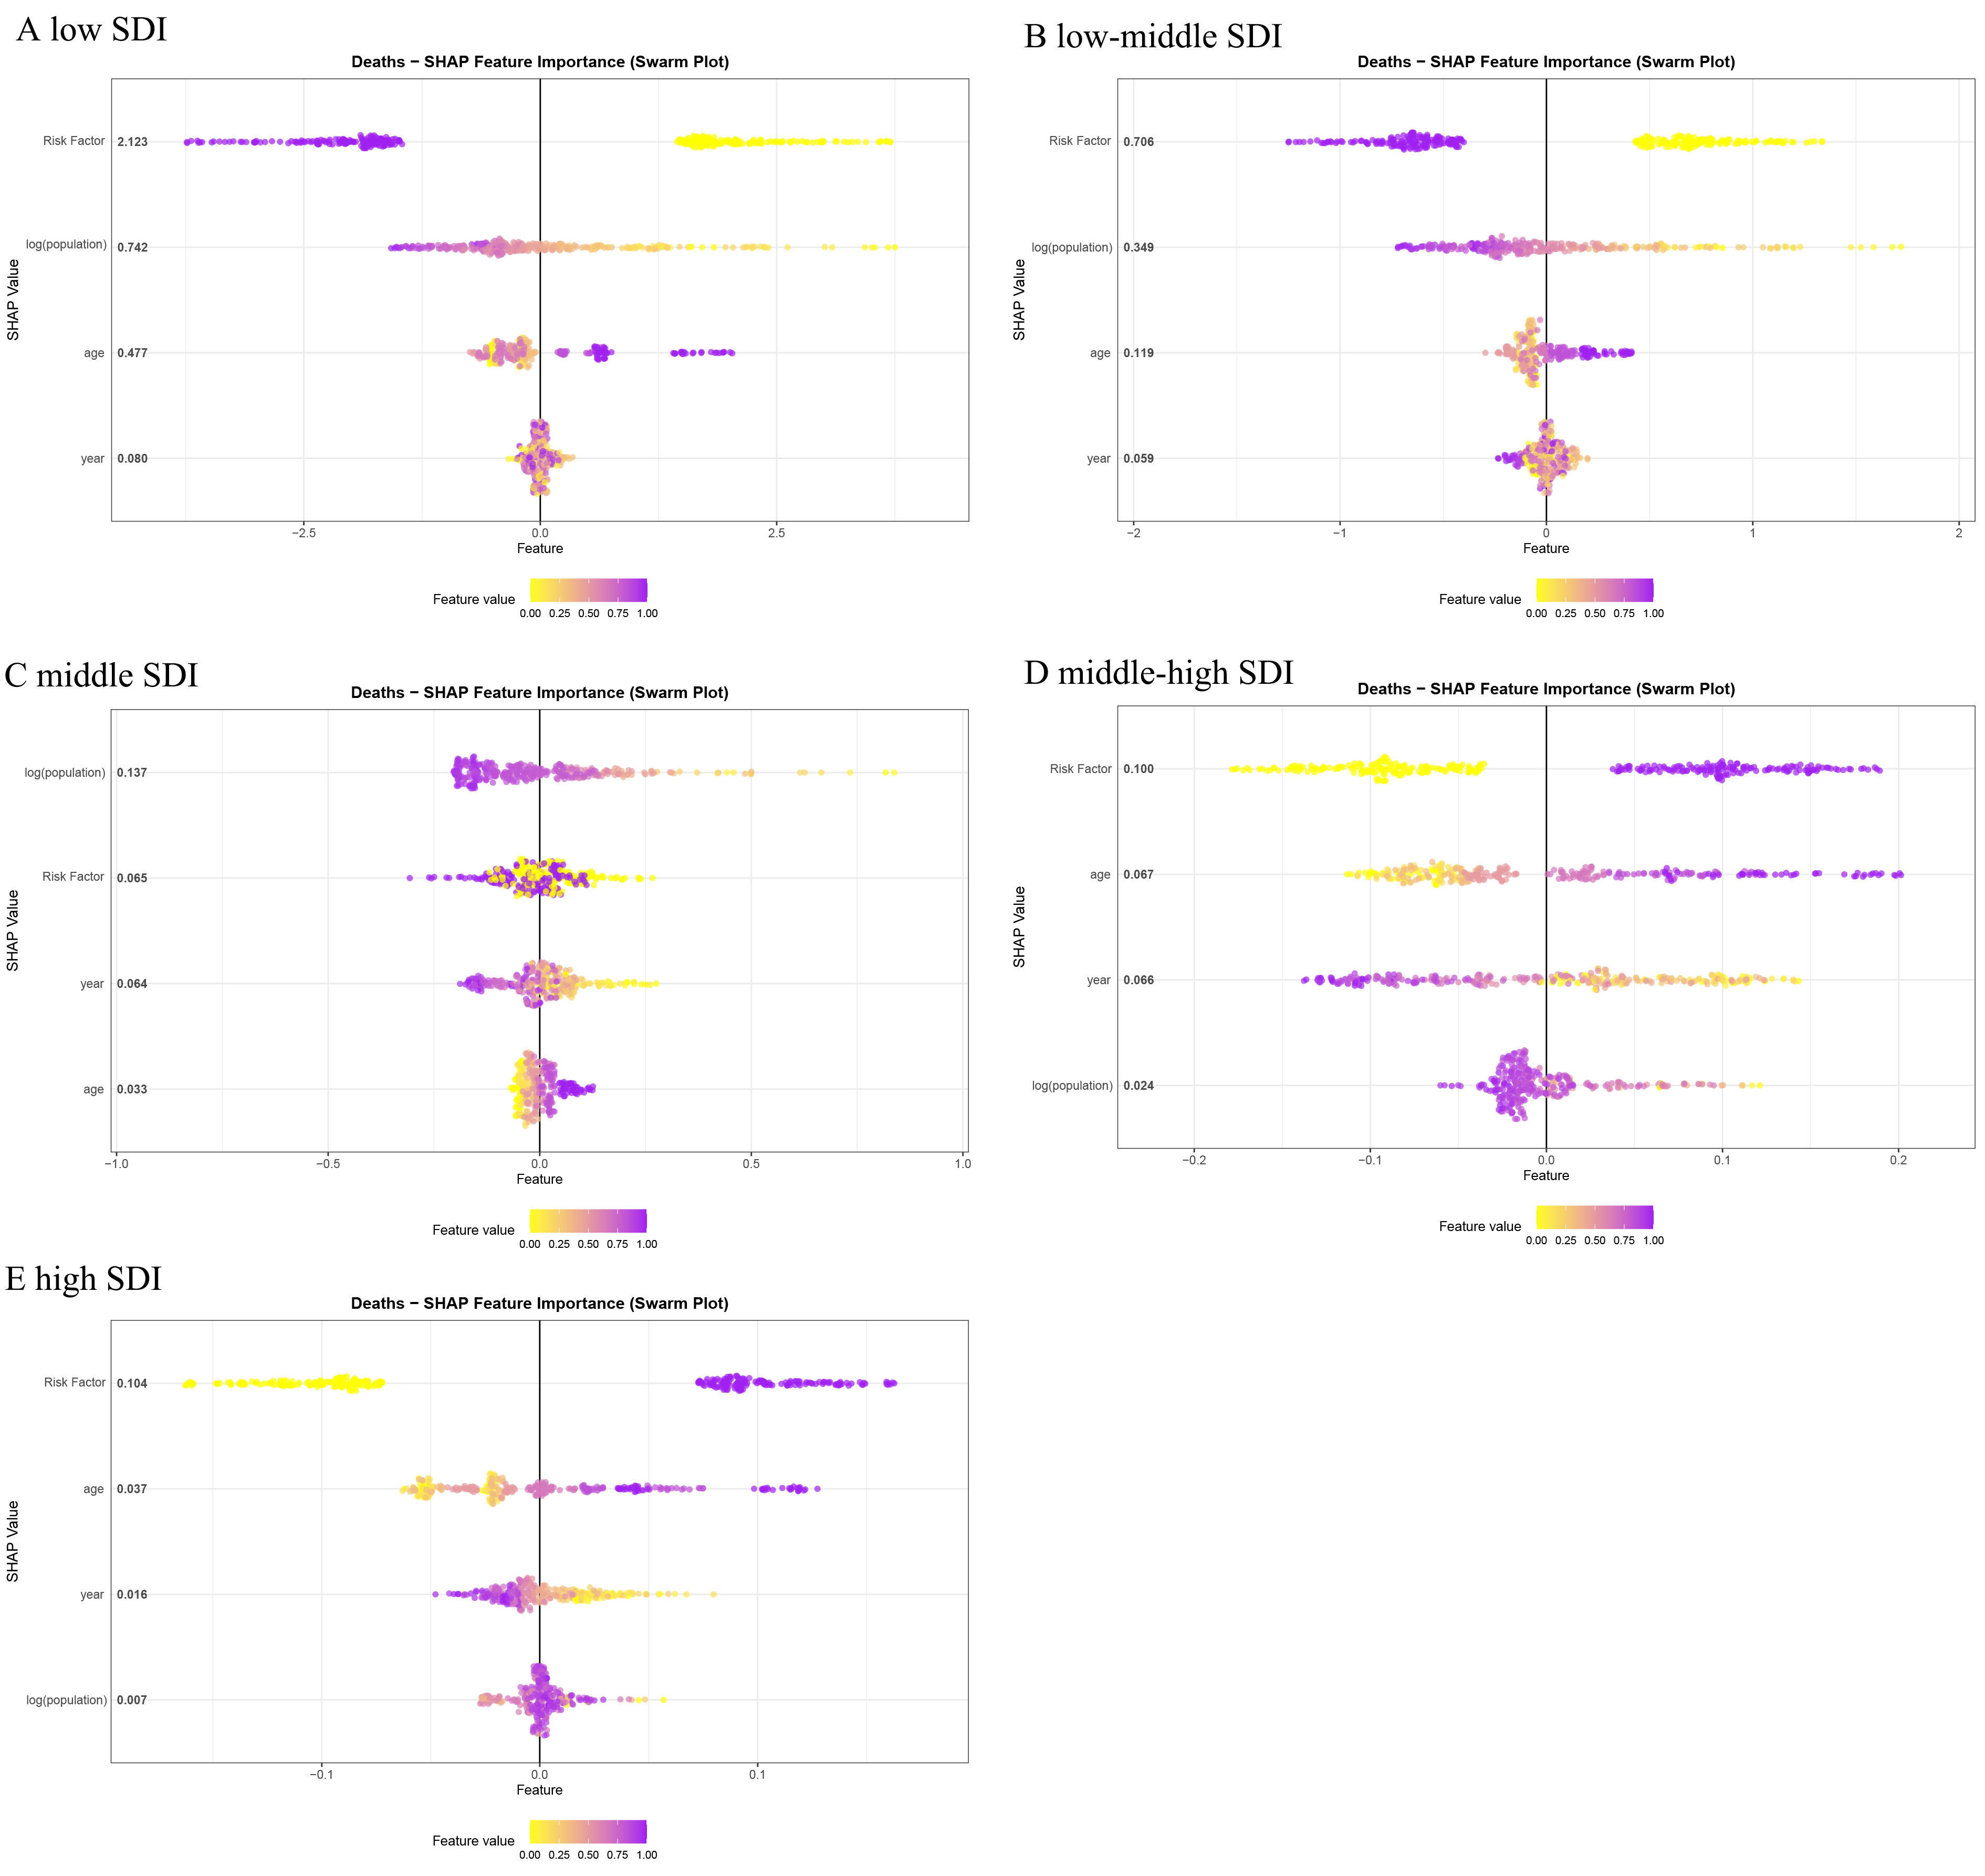


Fig. S4 SHAP summary for LRIs mortality among WCBA across SDI quintiles. Beeswarm plots rank features by mean absolute SHAP value (left labels); points are colored by feature magnitude (yellow, high; purple, low), with positive values indicating increased mortality risk and negative values suggesting protective effects. (A) Low SDI: Risk Factor dominated, followed by log(population); both exerted positive effects. Age and year showed weaker, bidirectional contributions. (B) Low-middle SDI: Risk Factor remained foremost, with log(population) second; both displayed positive SHAP values. Age and year had minimal, mixed impacts. (C) Middle SDI: log(population) surpassed Risk Factor as the top predictor, both conferring positive contributions. Year and age demonstrated modest, heterogeneous effects. (D) Middle-high SDI: Risk Factor ranked highest, whereas age and year showed comparable, modest bidirectional influences, log(population) contributed least and predominantly negatively, implying protection. (E) High SDI: Risk Factor maintained the strongest influence, followed by age and year, log(population) remained weakest with largely negative values, suggesting a risk-reducing association. LRIs, lower respiratory infections; WCBA, women of childbearing age; SDI, socio-demographic index; SHAP, SHapley Additive exPlanations.


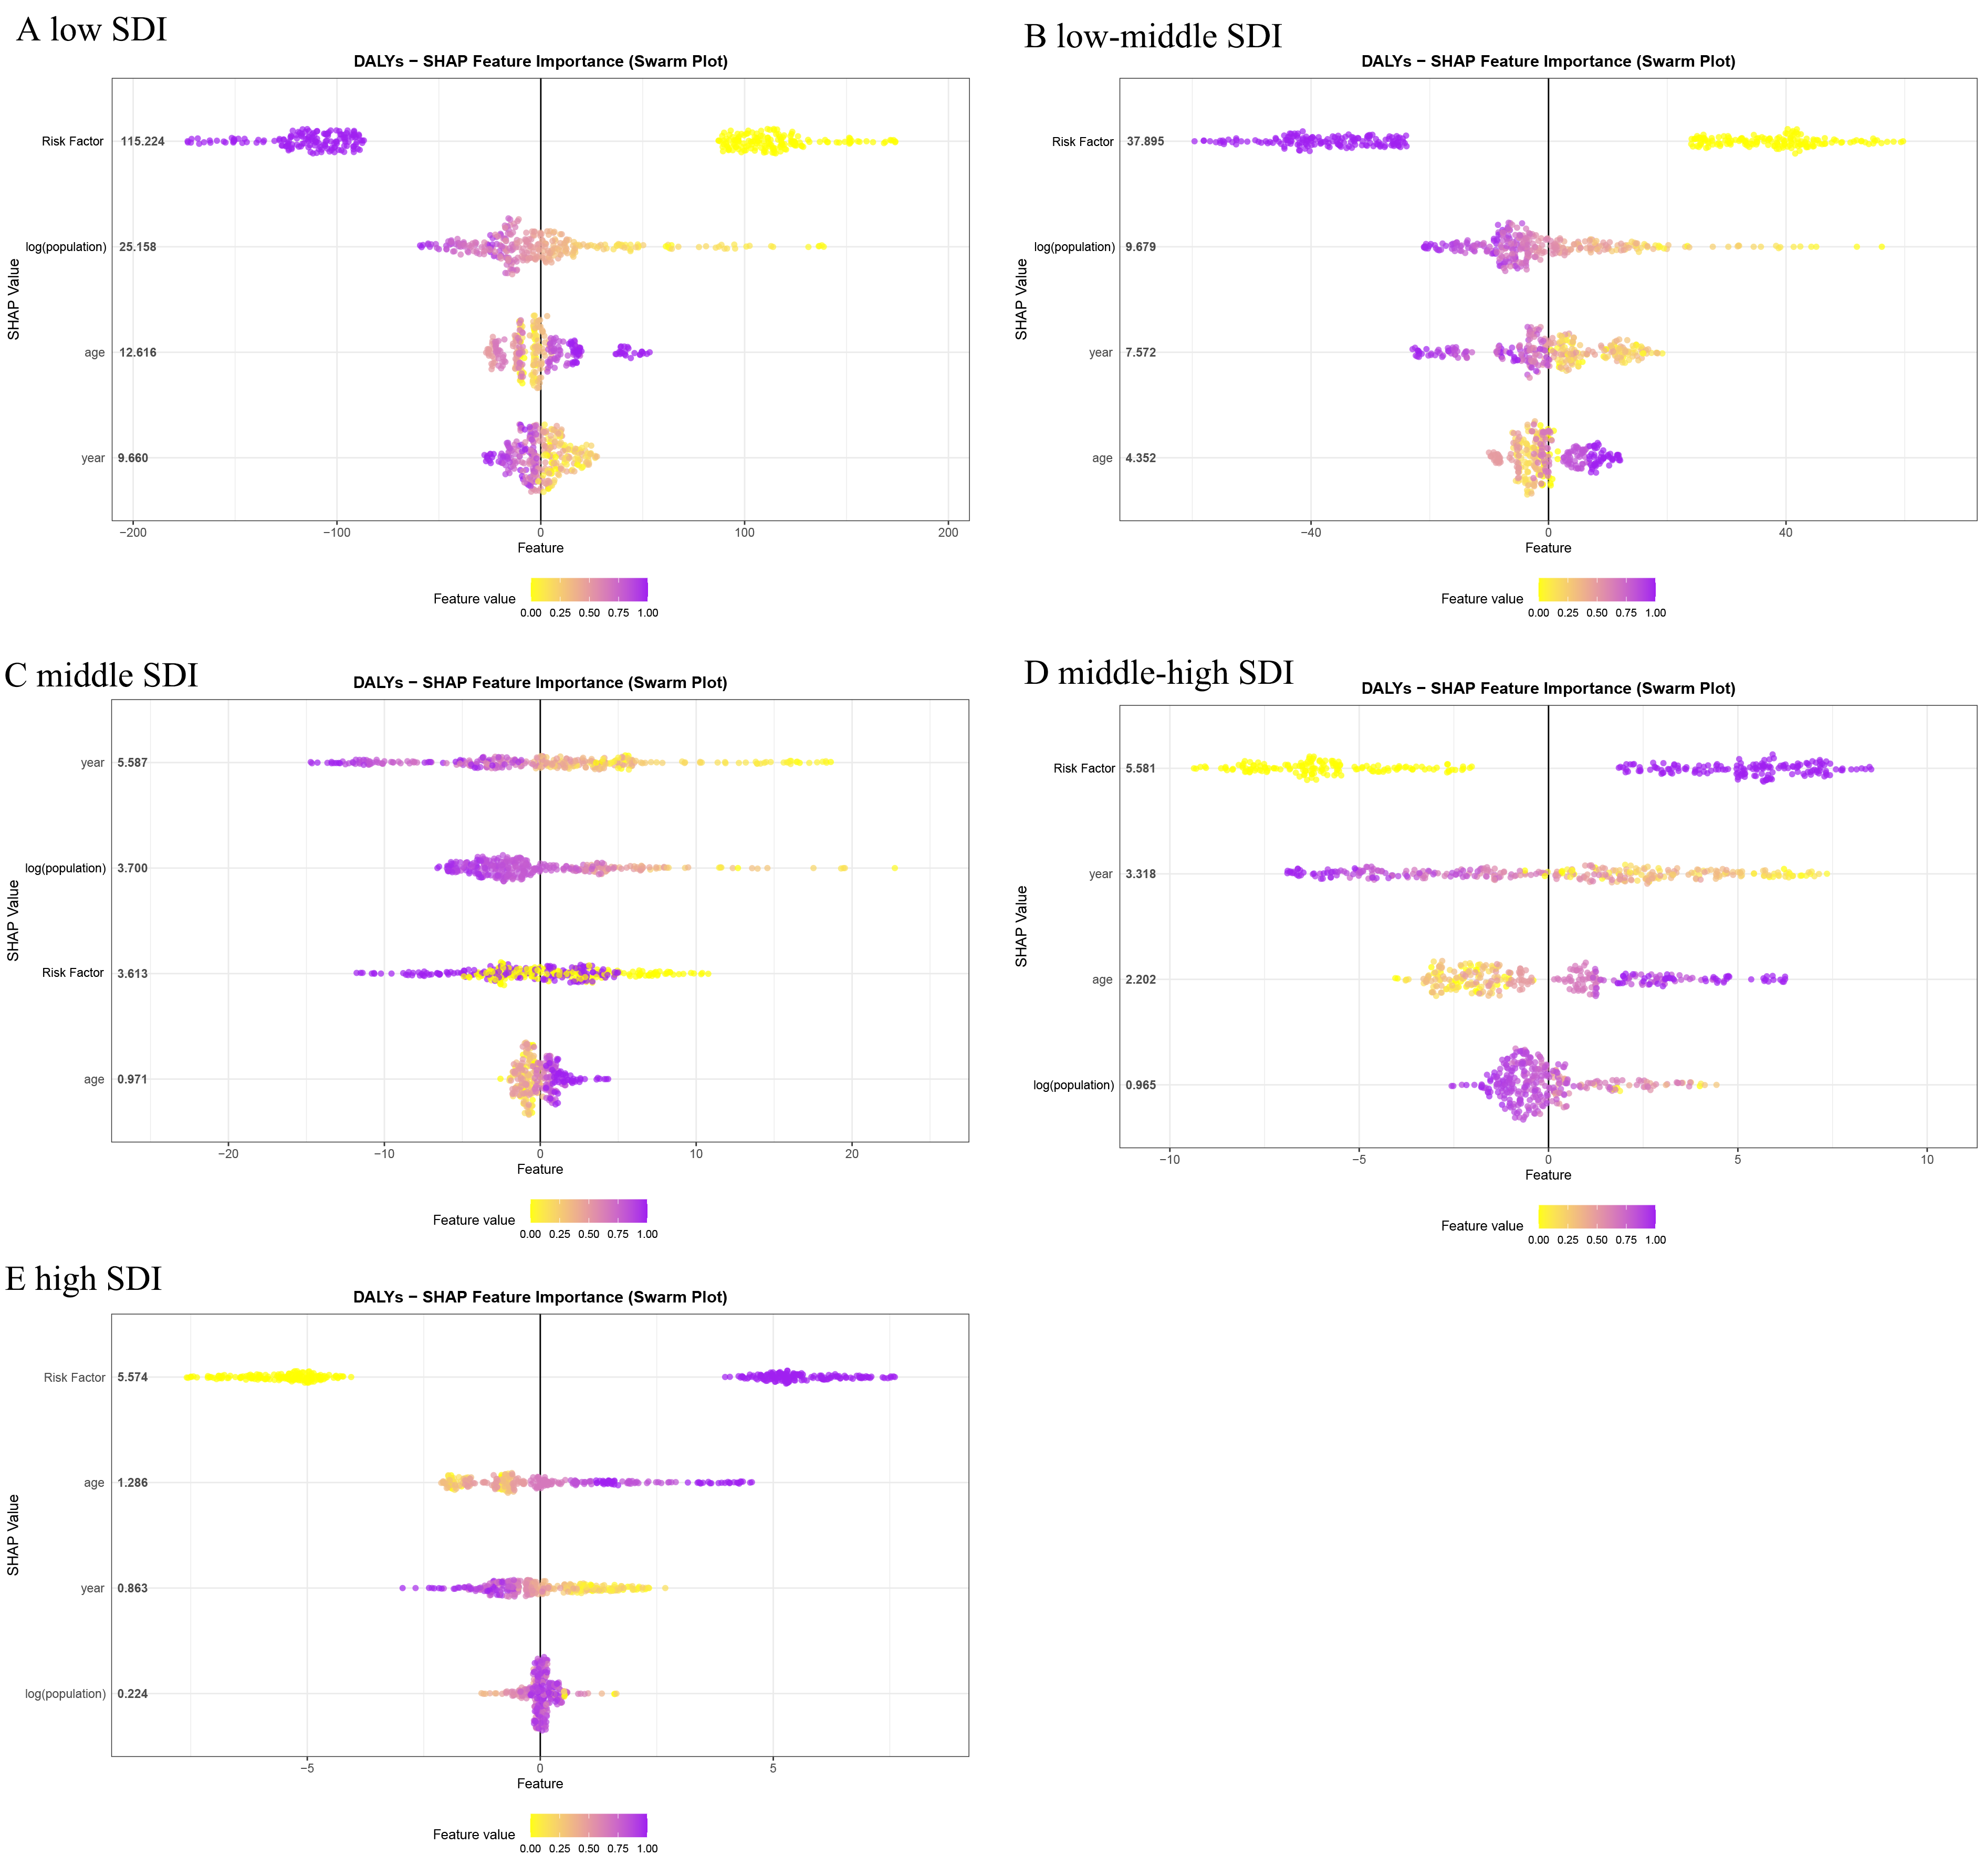


Fig. S5 XGBoost model interpretation via SHAP for DALYs among WCBA across SDI quintiles. Beeswarm plots display four features—age, year, Risk Factor, and log(population)—ranked by mean absolute SHAP value (left labels). Each point represents one observation, colored by feature magnitude. Positive SHAP values reflect increased DALY burden, whereas negative values indicate protective associations. (A) Low SDI: Risk Factor dominated with predominantly positive values; log(population), age and year showed weaker, bidirectional effects. (B) Low-middle SDI: Risk Factor remained foremost, conferring mainly positive SHAP values; log(population), year, and age exhibited modest, mixed contributions. (C) Middle SDI: year ranked highest, followed by log(population). Risk Factor and age contributed minimally with heterogeneous directions. (D) Middle-high SDI: Risk Factor demonstrated the greatest mean absolute SHAP value with predominantly positive effects; year, age, and Risk Factor displayed comparable, bidirectional impacts. (E) High SDI: Risk Factor reclaimed the top position, showing largely positive effects; age and year had similar, mixed contributions, whereas log(population) was weakest and predominantly positive effects. LRIs, lower respiratory infections; WCBA, women of childbearing age; SDI, socio-demographic index; DALYs, disability-adjusted life years; SHAP, SHapley Additive exPlanations; XGBoost, eXtreme Gradient Boosting.

**
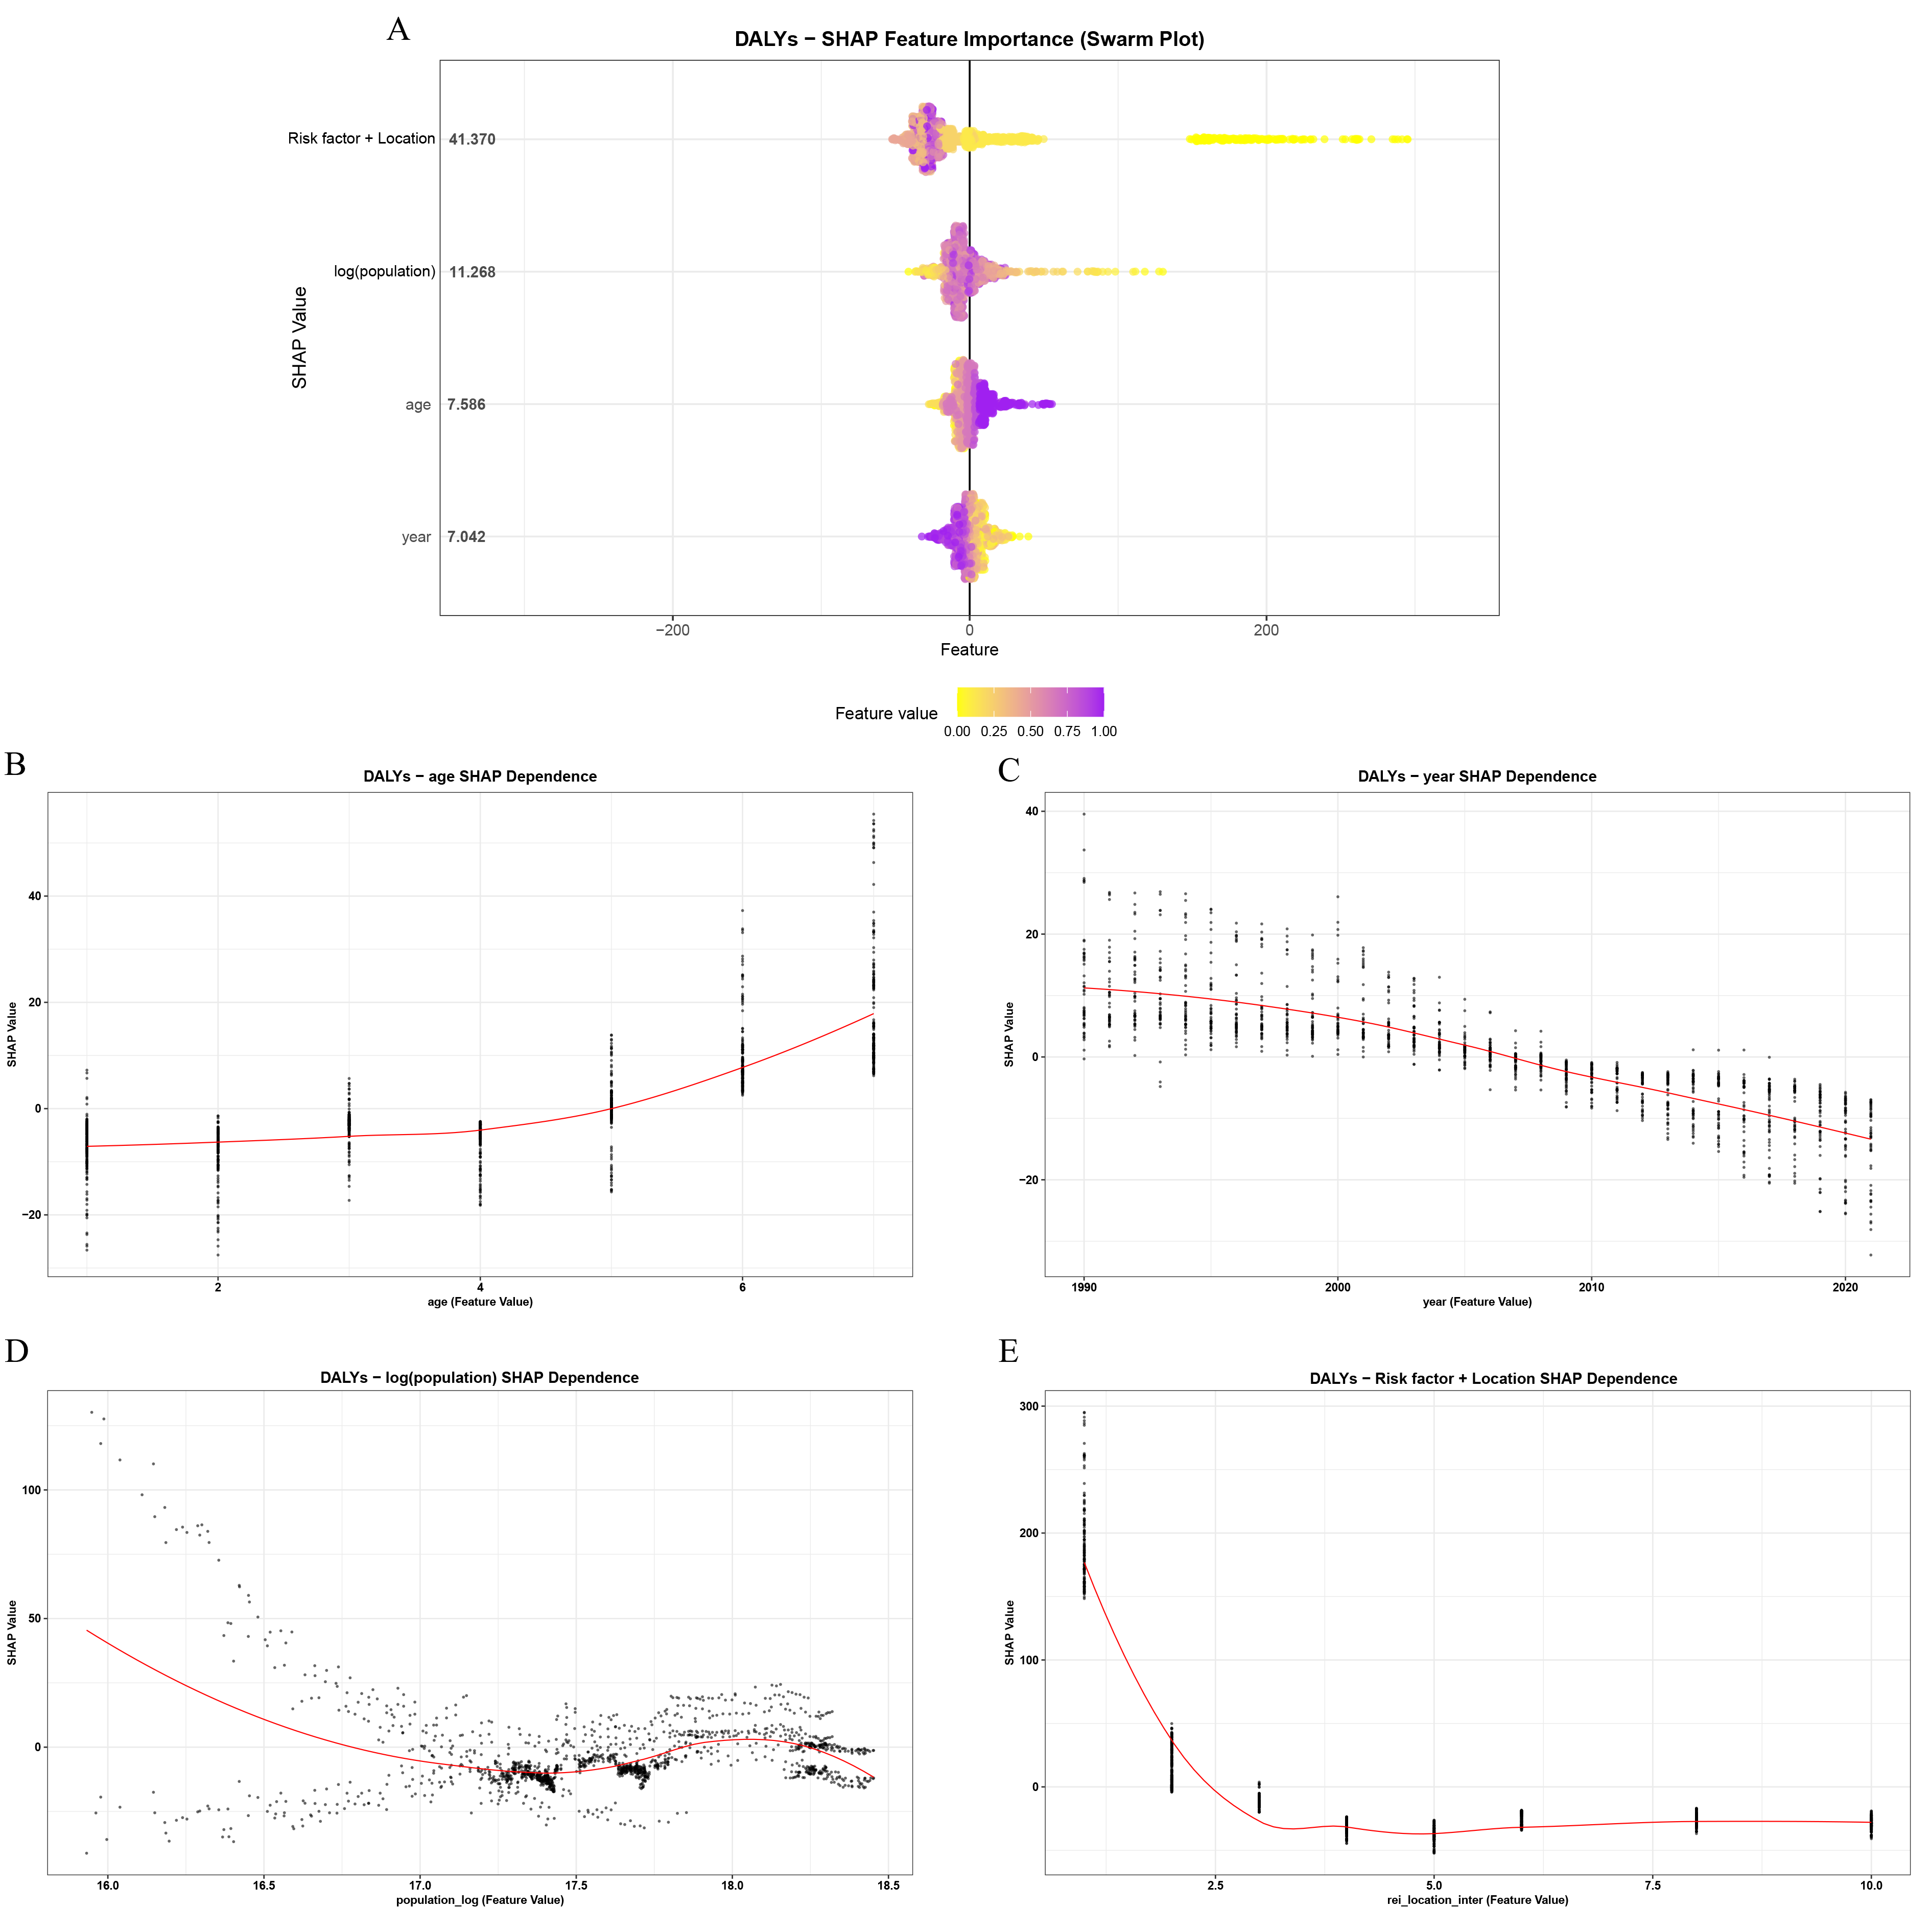
**

Fig. S6 XGBoost Model Interpretation via SHAP for LRIs DALYs Among WCBA Across Five SDI. SHAP summary plots illustrate the effects of four features-age, year, risk factor-location interaction, and population logarithm-on LRIs DALYs. (A) Summary plot. (B-E) Dependence plots illustrating the contribution of age (B), year (C), log(population) (D), and risk factor-location interaction (E). Each dot corresponds to an individual observation in the dataset; color intensity denotes the original feature value (pink = high value, yellow = low value). The x-axis shows SHAP values, which reflect the magnitude and direction of the feature’s impact on the XGBoost model output; the y-axis lists the respective features. LRIs, lower respiratory infections; WCBA, women of childbearing age; SDI, socio-demographic index; DALYs, disability-adjusted life years; SHAP, Shapley additive explanations.

**
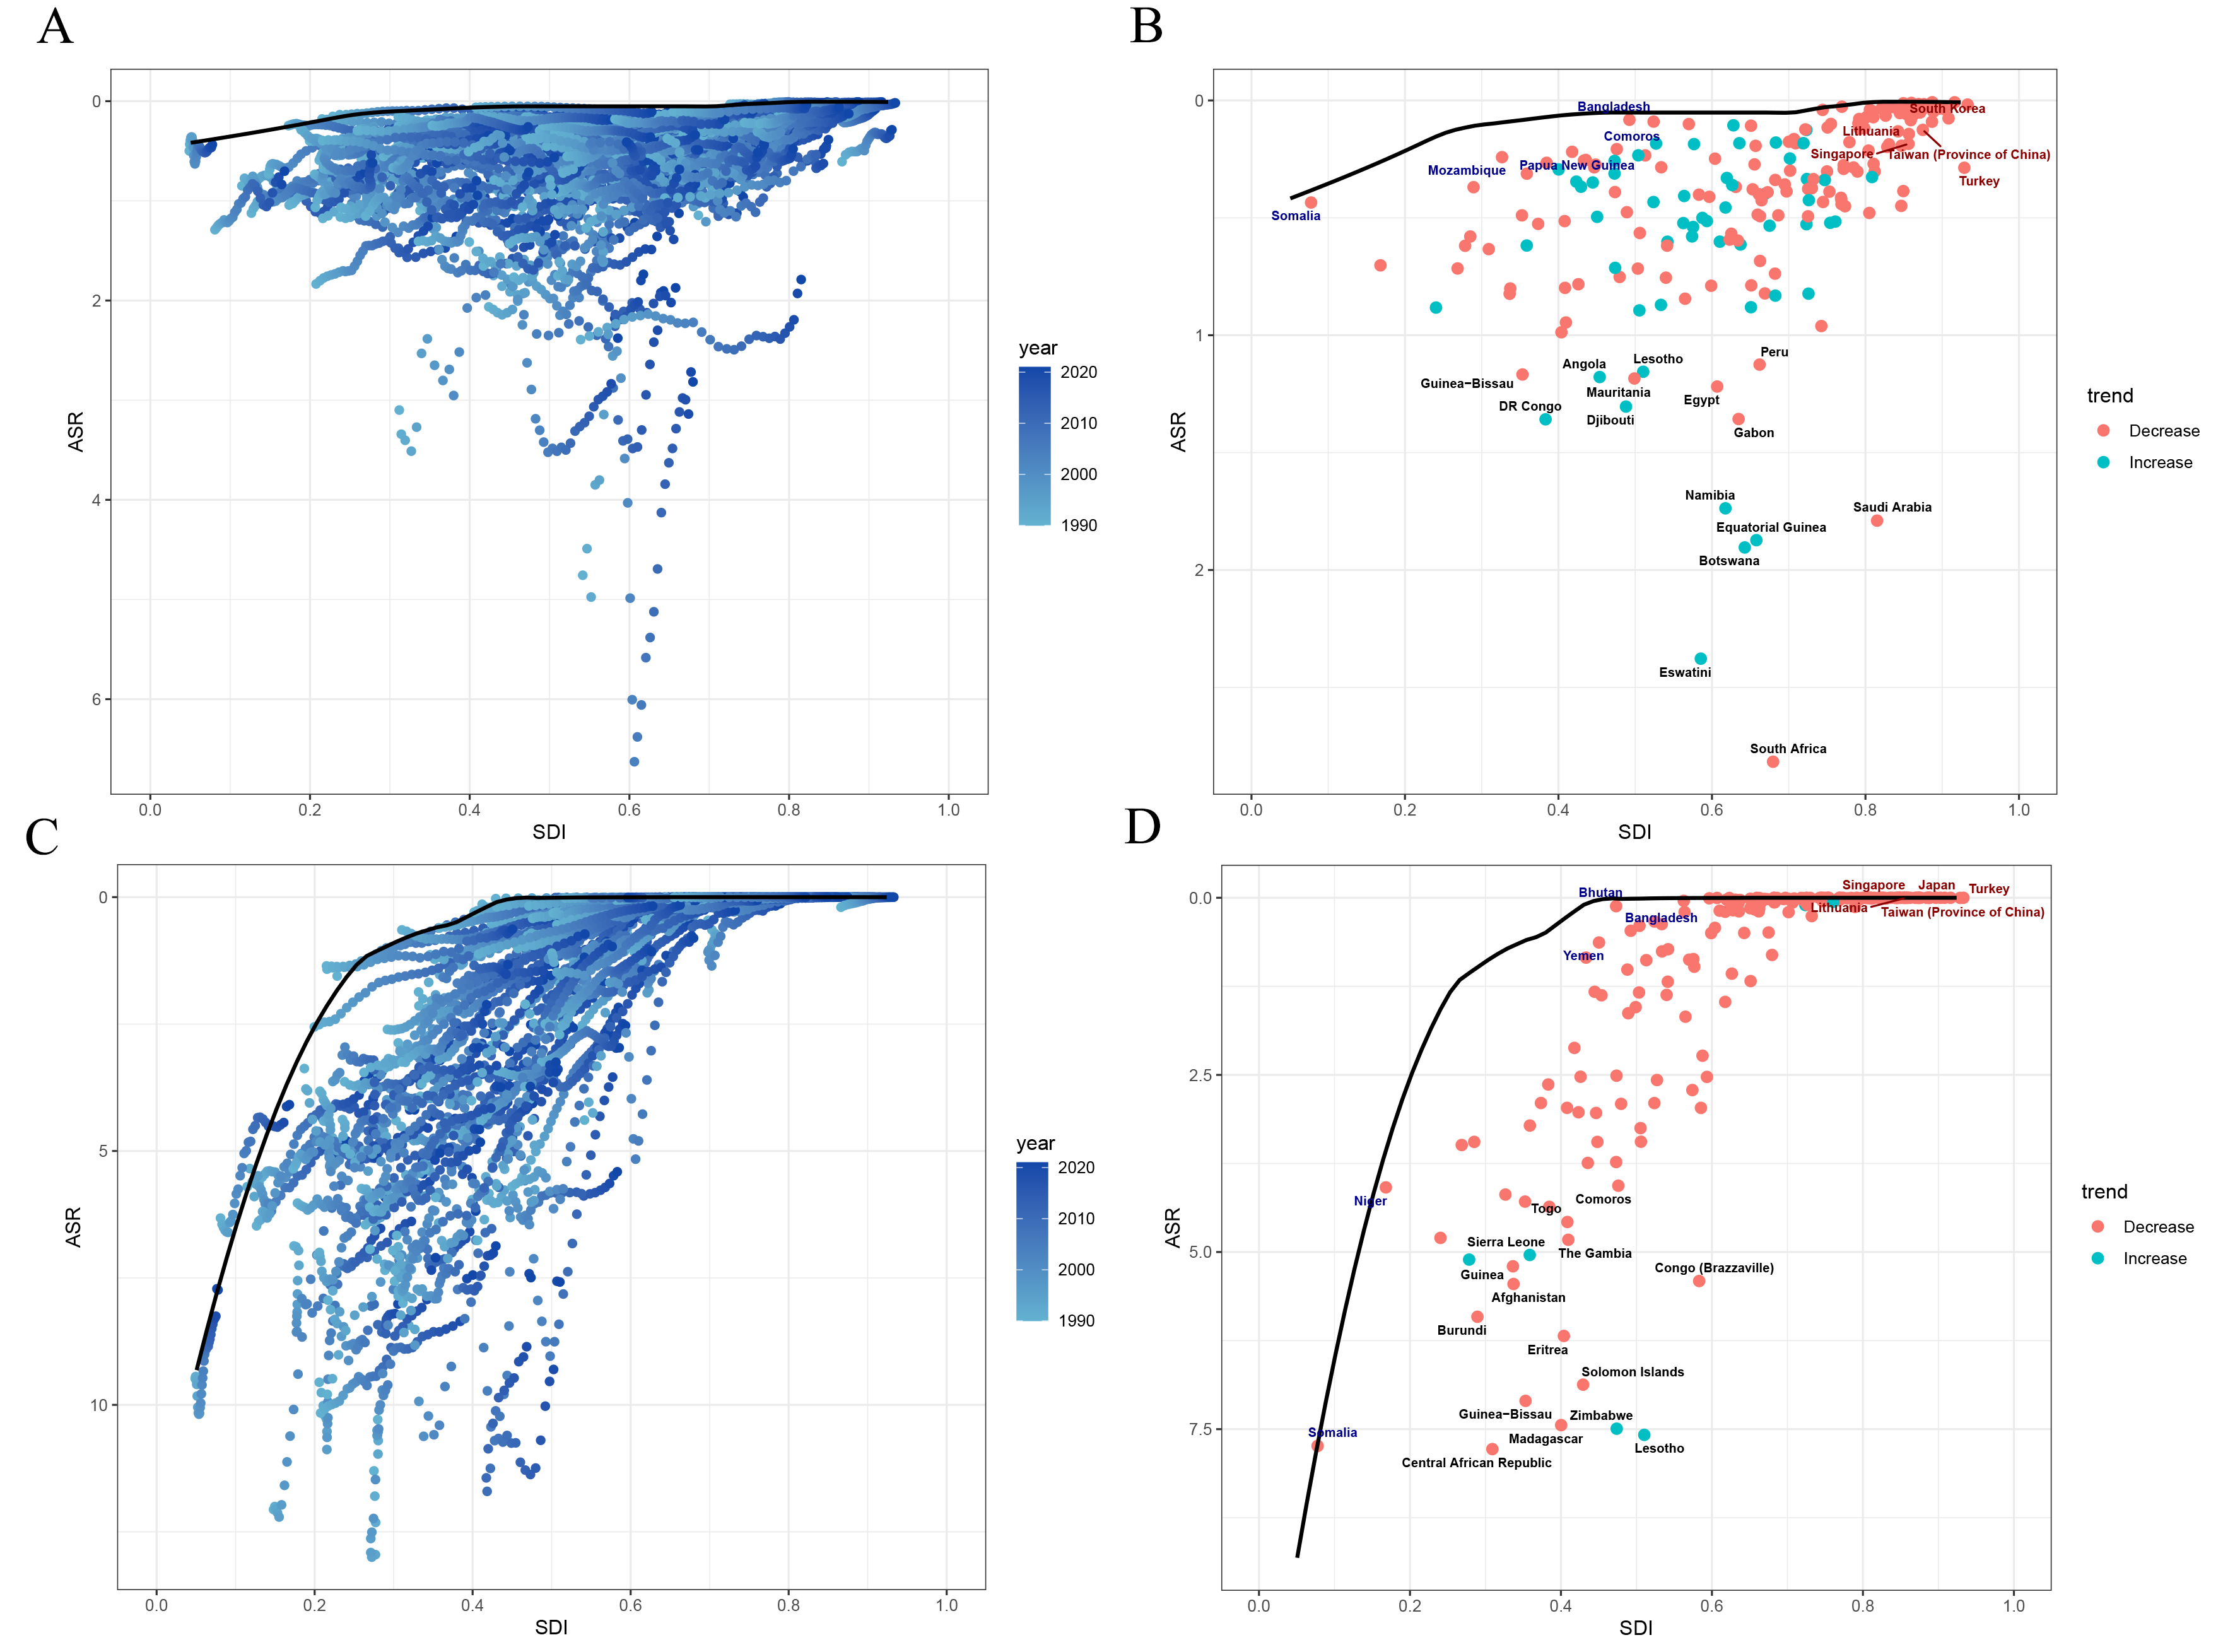

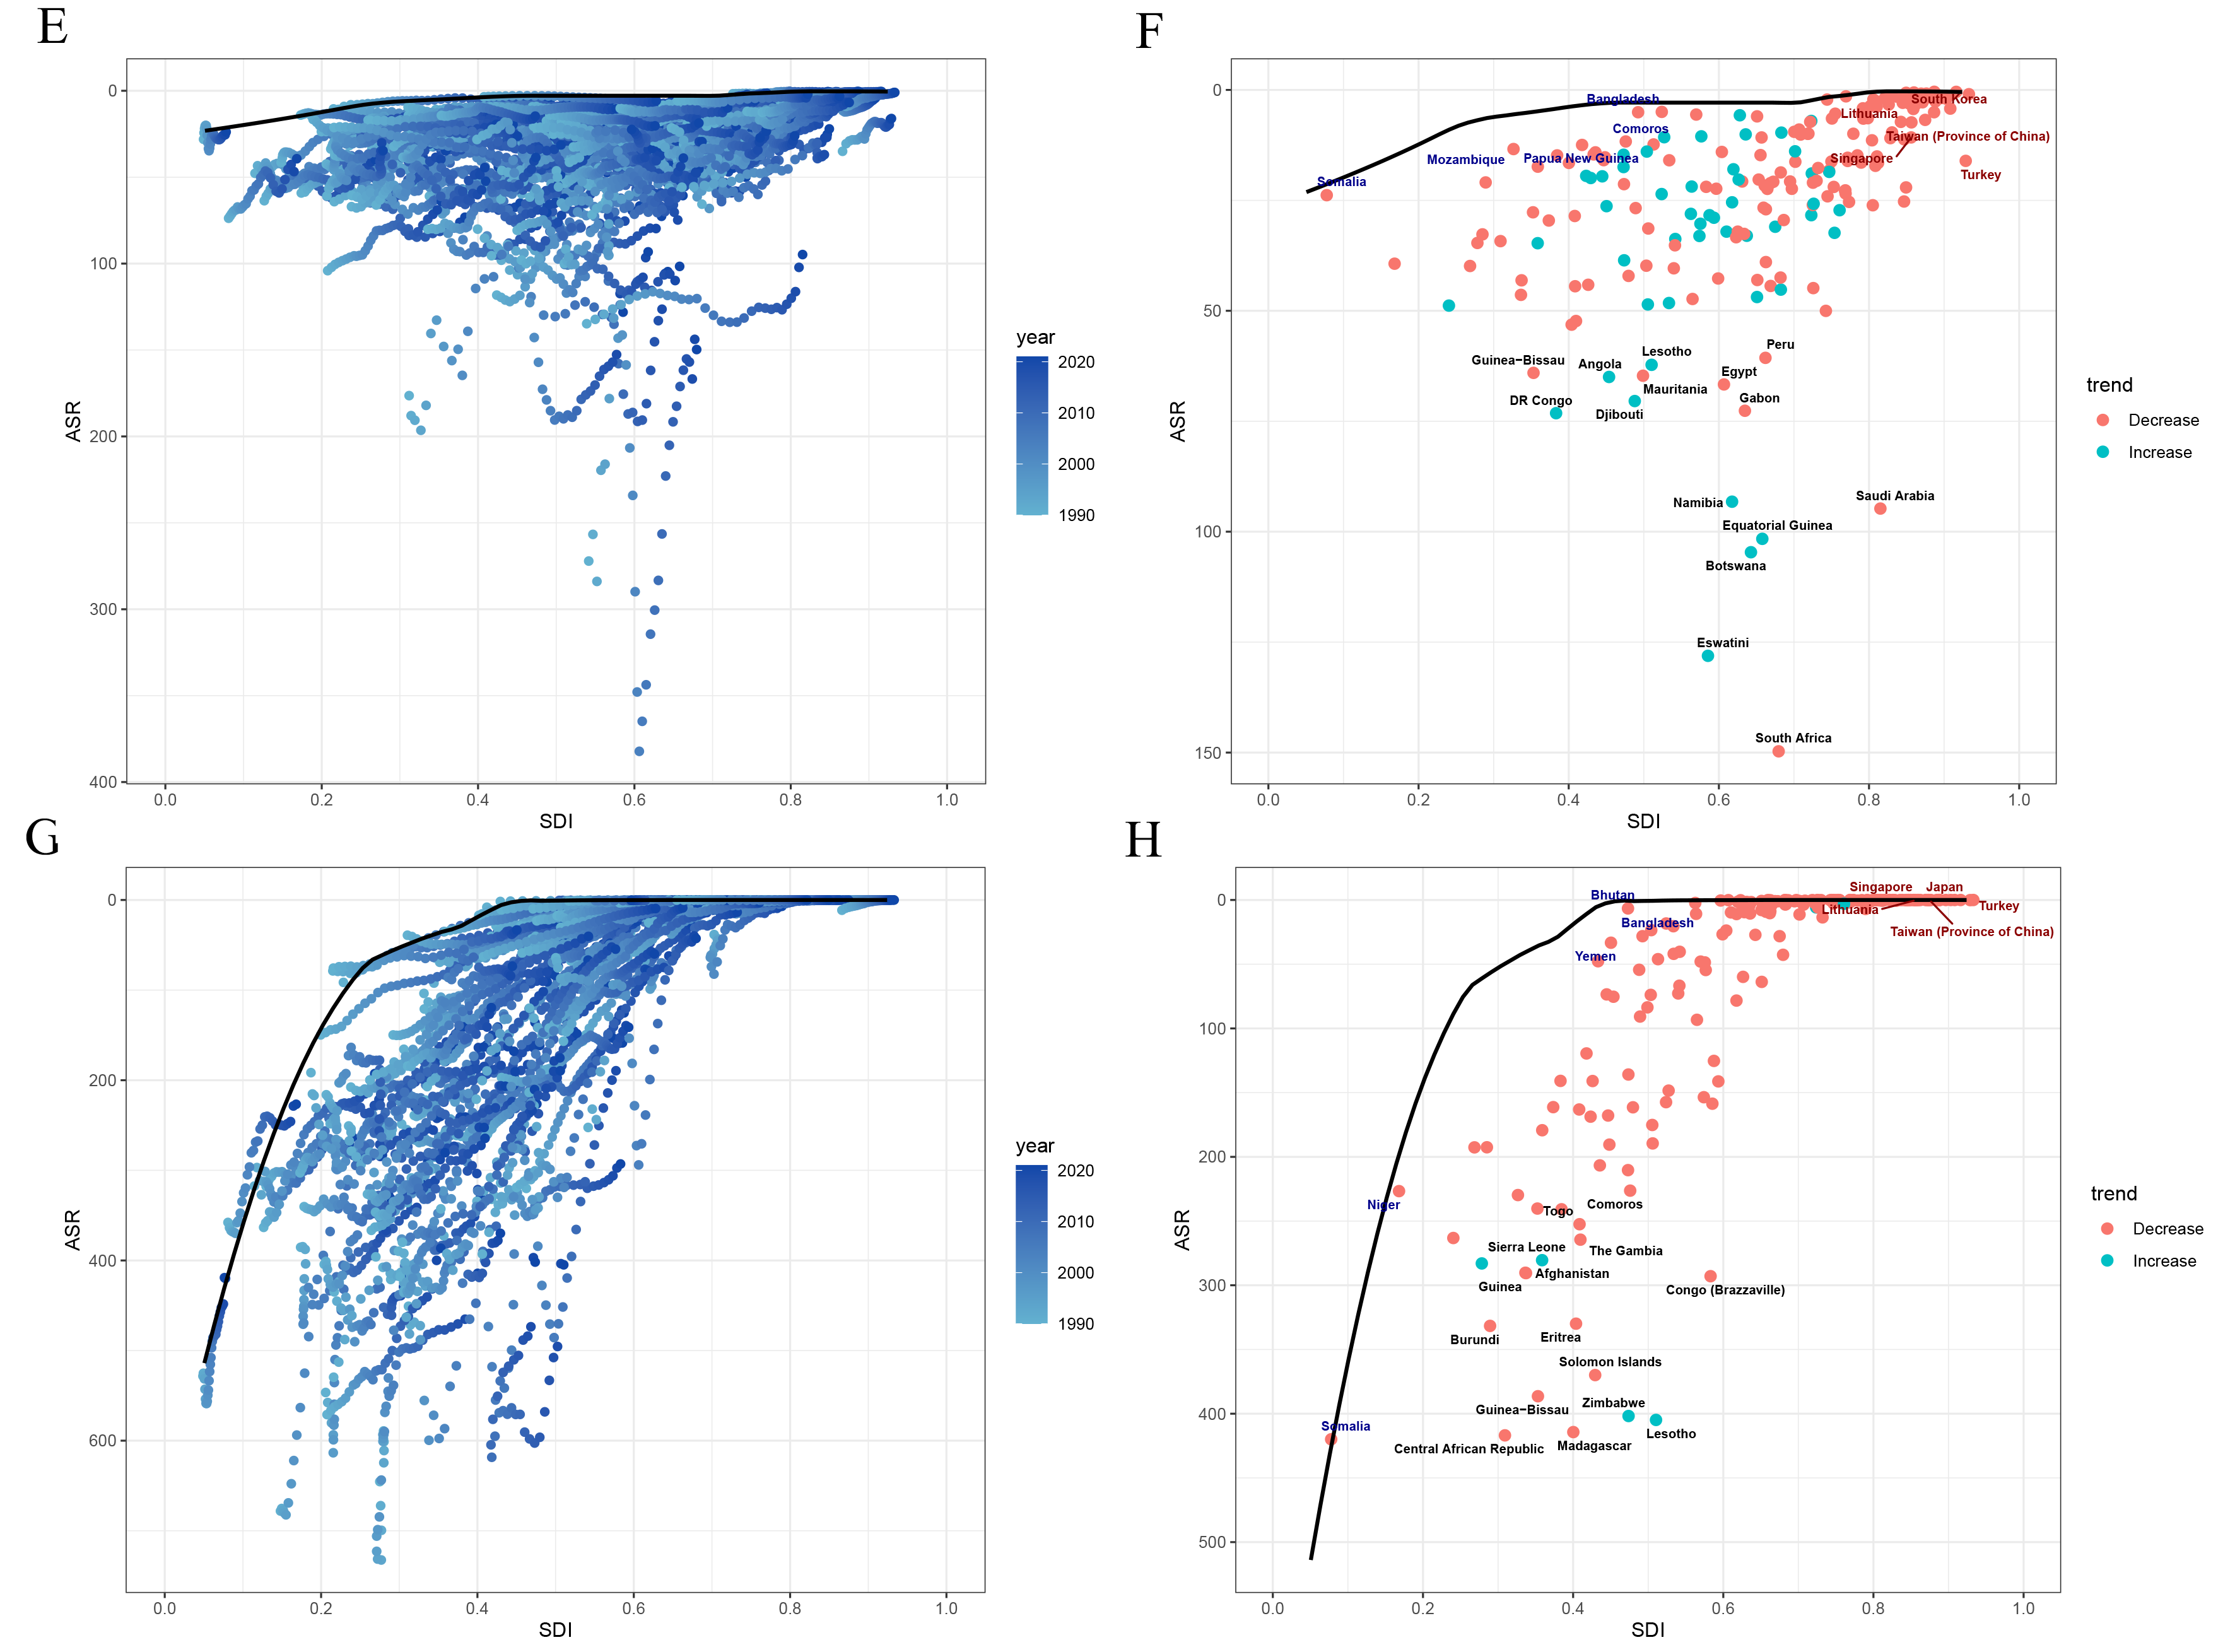
**

Fig. S7 Frontier Analysis of LRI Epidemiology and SDI Across 204 Countries and Territories, 1990-2021. Panels A, C, E, G: Temporal trends (1990-2021) in age-standardized indicators shown via color gradients (light blue to dark blue). Panels B, D, F, H: 2021 cross-sectional data - each point represents a country or territory; the black line denotes the efficiency frontier; the top 15 countries with the largest frontier gaps are labeled; blue-to-red color spectrum denotes SDI levels (blue = lowest-SDI, red = highest-SDI); dot colors reflect 1990 - 2021 trends in ASMR (B and D) and ASDR (F and H) (orange = decrease, green = increase). LRIs, lower respiratory infections; WCBA, women of childbearing age; SDI, socio-demographic index; DALYs, disability-adjusted life years; ASMR, age-standardized mortality rate; ASDR, age-standardized DALYs rate.
